# Supplementary material for: Simulating and Predicting Adsorption of Organic Pollutants onto Black Phosphorus Nanomaterials
Source: MDPI journal article supplement (doi:10.3390/nano12040590), 2022-02-09
Supplement: s1 [file s1]

## Supporting Information

# Simulating and Predicting Adsorption of Organic Pollutants onto Black Phosphorus Nanomaterials

Lihao Su <sup>1</sup>, Ya Wang <sup>1</sup>, Zhongyu Wang <sup>1</sup>, Siyu Zhang <sup>2,\*</sup>, Zijun Xiao <sup>1</sup>, Deming Xia <sup>1</sup> and Jingwen Chen <sup>1,\*</sup>

<sup>1</sup> Key Laboratory of Industrial Ecology and Environmental Engineering (Ministry of Education), Dalian Key Laboratory on Chemicals Risk Control and Pollution Prevention Technology, School of Environmental Science and Technology, Dalian University of Technology, Dalian 116024, China;

su\_lihao@mail.dlut.edu.cn (L.S.); yaanne@mail.tsinghua.edu.cn (Y.W.); wzy1989@mail.dlut.edu.cn (Z.W.); xzj960729@mail.dlut.edu.cn (Z.X.); xiadm@mail.dlut.edu.cn (D.X.)

<sup>2</sup> Key Laboratory of Pollution Ecology and Environmental Engineering, Institute of Applied Ecology, Chinese Academy of Sciences, Shenyang 110016, China

\* Correspondence: syzhang@iae.ac.cn (S.Z.); jwchen@dlut.edu.cn (J.C.)

**This supporting information (SI) file consists of 46 pages, including 8 figures and 17 tables.**

## Contents

|                                                                                                                               |   |
|-------------------------------------------------------------------------------------------------------------------------------|---|
| Structural information about graphene model for density functional theory (DFT) and molecular dynamics (MD) calculations..... | 3 |
| Convergence of potential mean force (PMF) curves/free energy [ $G(Z)$ ] .....                                                 | 3 |
| Theory description on relationships between equilibrium constant ( $K$ ) and free energy change ( $\Delta G$ ).....           | 4 |
| Contributions of entropy, enthalpy and water to $\log K$ .....                                                                | 5 |
| pp-LFER models for $\log K$ of BP and graphene.....                                                                           | 7 |
| Figure S1. Construction of adsorption system for MD simulation. ....                                                          | 8 |
| Figure S2. Convergence analysis of free energy [ $G(Z)$ ].....                                                                | 8 |
| Figure S3. Water molecules onto BP surface .....                                                                              | 9 |
| Figure S4. Representative trajectory snapshots of the adsorption of phenanthrene onto BP .....                                | 9 |

|                                                                                                                                                                                         |    |
|-----------------------------------------------------------------------------------------------------------------------------------------------------------------------------------------|----|
| Figure S5. Superimposed conformations of phenanthrene sampled in free energy calculations.....                                                                                          | 10 |
| Figure S6. Plots of the pp-LFER models predicted $ E_{ad(pre)} $ or $\log K_{pre}$ versus DFT or MD calculated $ E_{ad(cal)} $ or $\log K_{cal}$ in the gaseous and aqueous phases..... | 10 |
| Figure S7. Williams plots of standardized residuals ( $\delta^*$ ) versus leverage ( $h$ ) for the pp-LFER models on $ E_{ad} $ or $\log K$ in the gaseous and aqueous phases.....      | 11 |
| Figure S8. Average contributions of each term of pp-LFER to the overall adsorption ( $\log K$ ) of BP and graphene.....                                                                 | 11 |
| Table S1. MD calculated $\log K$ and DFT calculated $ E_{ad} $ values for the adsorption of 41 compounds onto BP in aqueous and gaseous phases.....                                     | 12 |
| Table S2. Comparison of experimental and DFT calculated $E_{ad}$ values for adsorption of organic compounds onto graphene in gaseous phase.....                                         | 15 |
| Table S3. Comparison of experimental and MD calculated values for adsorption of aromatic compounds onto graphene in aqueous phase.....                                                  | 15 |
| Table S4. Refined charge parameters for methyl-2-methylbenzoate.....                                                                                                                    | 16 |
| Table S5. Refined dihedral parameters for methyl-2-methylbenzoate.....                                                                                                                  | 17 |
| Table S6. Refined charge parameters for 2,4-dinitrotoluene.....                                                                                                                         | 17 |
| Table S7. Refined dihedral parameters for 2,4-dinitrotoluene.....                                                                                                                       | 19 |
| Table S8. Refined angle parameters for malonic acid.....                                                                                                                                | 19 |
| Table S9. Refined dihedral parameters for malonic acid.....                                                                                                                             | 19 |
| Table S10. Refined dihedral parameters for 1,2-dinitrobenzene.....                                                                                                                      | 20 |
| Table S11. Adsorption free energy ( $\Delta G_{MD}$ ) of 41 compounds onto BP in aqueous and gaseous phases.....                                                                        | 20 |
| Table S12. Theoretical intercept values ( $\log C$ ) in linear relationships between the MD calculated $\log K_{cal}$ and $\Delta G_{MD}$ for graphene.....                             | 22 |
| Table S13. Analysis of the conformations of the adsorbates onto BP surface.....                                                                                                         | 23 |
| Table S14. Equilibrium configurations of the adsorbates onto BP surface.....                                                                                                            | 32 |
| Table S15. Root mean square deviation ( $RMSD$ ) between the initial and the optimized adsorption configurations of BP.....                                                             | 40 |
| Table S16. Relative contributions of different interactions to the overall adsorption of BP in the gaseous phase.....                                                                   | 42 |

|                                                                                                                                                                     |    |
|---------------------------------------------------------------------------------------------------------------------------------------------------------------------|----|
| Table S17. Adsorption free energy ( $\Delta G_{\text{MD}}$ ) and $\log K$ values for 30 aromatic compounds onto BP and graphene in aqueous and gaseous phases. .... | 43 |
| REFERENCES .....                                                                                                                                                    | 45 |

## **Structural information about graphene model for density functional theory (DFT) and molecular dynamics (MD) calculations**

A graphene supercell ( $8 \times 5 \times 1$ ) with 160 carbon atoms was built for the DFT calculations. A periodic box of  $19.65 \times 21.27 \times 25.00 \text{ \AA}^3$  was applied in the adsorbate-graphene system.

A three-layer graphene adsorbent in a periodic box of  $36.00 \times 36.00 \times 40.00 \text{ \AA}^3$  was built for the MD simulations. The generic atomic type for aromatic carbon (CG2R61) archived in CHARMM General Force Field (CGenFF) [1] was adopted to represent graphene carbon atoms, which was successfully employed to simulate adsorption of compounds onto graphene [2]. Other parameters for the MD and DFT calculations on the graphene system were the same as those for the calculations on black phosphorus (BP), which were given in the main text.

## **Convergence of potential mean force (PMF) curves/free energy [ $G(Z)$ ]**

The convergence of  $G(Z)$  of each simulation was checked. Taking phenanthrene as an example, curves of  $G(Z)$  sampled at 50 and 100 ns almost overlapped (Figure S2a), and the normalized  $G(Z)$  of 0 ~ 50 ns was almost equal to that of 50 ~ 100 ns (Figure S2b). Thus, a simulation time of 100 ns is sufficient for the convergence of the  $G(Z)$ . Likewise, the  $G(Z)$  convergence of other compounds was checked.

## Theory description on relationships between equilibrium constant ( $K$ ) and free energy change ( $\Delta G$ )

$K$  for the partitioning of a given compound between two phases 1 and 2 is related to their corresponding  $\Delta G$ , enthalpy ( $\Delta H$ ), and entropy ( $\Delta S$ ):

$$K = x_1/x_2 = e^{-\Delta G/RT} = e^{-(\Delta H - T\Delta S)/RT} \quad (1)$$

where  $R$  is the universal gas constant ( $8.314 \text{ J mol}^{-1} \text{ K}^{-1}$ ),  $T$  is temperature, and  $x_i$  is the molar fraction of the compound in phase  $i$ .  $K$  from adsorption experiments, is not dimensionless, and is expressed as:

$$K = c_1/c_2 = (x_1/x_2) \times (V/m) = (V/m) \times e^{-\Delta G/RT} = (V/m) \times e^{-(\Delta H - T\Delta S)/RT} \quad (2)$$

where  $c_1$  is the concentration ( $\text{mol g}^{-1}$ ) of compound onto adsorbents (phases 1),  $c_2$  is the concentration ( $\text{mol mL}^{-1}$ ) of compound in solutions (phases 2),  $V$  ( $\text{mL}$ ) is the volume of solutions for the investigated systems,  $m$  ( $\text{g}$ ) is the mass of the adsorbent. Eq. (2) can be converted into:

$$\log K = -\Delta G/2.303RT + \log C = -(\Delta H - T\Delta S)/2.303RT + \log C \quad (3)$$

At infinite dilution, the factor ( $C$ ) is a constant, which is related to  $V$  and  $m$  ( $C = V/m$ ).

Theoretically, there is also an intrinsic correlation between the MD-calculated  $\log K_{\text{cal}}$  and  $\Delta G_{\text{MD}}$ :

$$\log K_{\text{cal}} = -\Delta G_{\text{MD}}/2.303RT + \log C \quad (4)$$

where the slope term  $-1/2.303RT$  is  $-0.73 \text{ mol kcal}^{-1}$  at  $T = 300 \text{ K}$ . According to eq. (4), the  $\log C$  values for the adsorption of 15 aromatics onto graphene were calculated (Table S12). Mean of the  $\log C$  values is  $-1.0$ , and standard deviation is  $0.1$ . For the adsorption of 41 adsorbates onto BP,  $\log C$  is also equal to  $-1.0 \pm 0.1$  no matter in aqueous or gaseous phases.

According to eq. (3) in the main text,  $\log C$  is relevant with  $\log S_A$  ( $S_A$ : specific surface areas of adsorbents). Since the difference ( $0.04$ ) in theoretical  $\log S_A$  values



between pristine BP and graphene is negligible, it is rational that the mean value of  $\log C$  for graphene is equal to that of BP. Thus, it can be inferred that theoretical value of the constant term  $\log C$  for pristine graphene and BP is -1.0.

### Contributions of entropy, enthalpy and water to $\log K$

According to eq. (3), the contribution of each polyparameter linear free energy relationship (pp-LFER) term to  $\log K$  can be decomposed into the enthalpic and entropic components by pp-LFERs integrated with the MD and DFT results.

For the 33 compounds in the training set, their  $\log K_{\text{gaseous}}$  values correlate with  $\Delta G_{\text{MD}}$  in gaseous phase:

$$\log K_{\text{gaseous}} = -0.70\Delta G_{\text{MD}} - 0.7, n = 33, r = 0.99, p < 0.01 \quad (5)$$

Since DFT calculated  $E_{\text{ad}}$  is essentially  $\Delta H$  in eq. (3), the above equation is equivalent to:

$$\log K_{\text{gaseous}} = 0.70|\Delta G_{\text{MD}}| - 0.7 = 0.70|E_{\text{ad}}| + 0.70T\Delta S - 0.7 \quad (6)$$

The  $|E_{\text{ad}}|$  and  $T\Delta S$  terms in eq. (6) can be substituted with their pp-LFERs:

$$\begin{aligned} \log K_{\text{gaseous}} &= 0.70|E_{\text{ad}}| + 0.70T\Delta S - 0.7 \\ &= 0.70 \times (6.0 + 1.4E - 7.4S + 1.2A + 6.6B + 3.4L) + 0.70 \times (-4.7 - 1.5E + 5.7S \\ &\quad - 2.6A - 4.8B - 1.2L) - 0.7 \\ &= 0.2 + (0.97E - 5.2S + 0.84A + 4.6B + 2.4L) + (-1.0E + 4.0S - 1.8A - 3.3B - \\ &\quad 0.84L) \end{aligned} \quad (7)$$

Likewise, for the adsorption of the 33 compounds onto BP in aqueous phase:

$$\begin{aligned} \log K_{\text{aqueous}} &= 0.68|\Delta G_{\text{MD}}| - 0.6 \\ &= 0.68|E_{\text{ad}}| + 0.68T\Delta S - 0.6 \\ &= 0.68 \times (1.5 + 3.5E - 3.8S + 0.89A + 1.7B + 13V) + 0.68 \times (-3.1 - 2.6E + \\ &\quad 5.0S - 0.76A - 2.0B - 6.6V) - 0.6 \\ &= -1.7 + (2.4E - 2.6S + 0.60A + 1.1B + 8.8V) + (-1.8E + 3.4S - 0.51A - 1.4B - \end{aligned}$$

$$4.5V) \quad (8)$$

According to eqs. (7) and (8), the contribution of each interaction term ( $eE$ ,  $sS$ ,  $aA$ ,  $bB$ ,  $vV$  or  $IL$ ) to  $\log K$  can be decomposed into the enthalpic ( $|E_{ad}|$ ) and entropic ( $T\Delta S$ ) components. For example, the enthalpic contribution ( $P_{eE, \text{enthalpic}}$ ) of the  $eE$  term to  $\log K_{\text{aqueous}}$  in eq. (8) can be estimated as:

$$P_{eE, \text{enthalpic}} = \frac{(\sum_{i=1}^n e_h E_i)}{\sum_{i=1}^n [(e_h + e_s)E_i + (s_h + s_s)S_i + (a_h + a_s)A_i + (b_h + b_s)B_i + (v_h + v_s)V_i + nc]} \quad (9)$$

where  $e_h E_i$ ,  $s_h S_i$ ,  $a_h A_i$ ,  $b_h B_i$  and  $v_h V_i$  represent enthalpic components of five interaction terms for compound  $i$ , which correspond to 2.4E, -2.6S, 0.60A, 1.1B and 8.8V in eq. (8), respectively;  $e_s E_i$ ,  $s_s S_i$ ,  $a_s A_i$ ,  $b_s B_i$  and  $v_s V_i$  represent entropic components of five interaction terms, which correspond to -1.8E, 3.4S, -0.51A, -1.4B and -4.5V in eq. (8), respectively;  $n$  represents the number of the compounds;  $c$  is intercept term, which corresponds to -1.7 in eq. (8).

The contribution of each pp-LFER term to  $\log K_{\text{aqueous}}$  also can be decomposed into contribution of water [ $\Delta G_{\text{H}_2\text{O}} = \Delta G_{\text{MD(aqueous)}} - \Delta G_{\text{MD(gaseous)}}$ ] and of the interaction [ $\Delta G_{\text{MD(gaseous)}}$ ] between BP and the compounds in gaseous phase by pp-LFERs of  $\Delta G_{\text{MD(gaseous)}}$  and  $\Delta G_{\text{H}_2\text{O}}$ .

$$\begin{aligned} \log K_{\text{aqueous}} &= 0.68 |\Delta G_{\text{MD(aqueous)}}| - 0.6 \\ &= 0.68 |\Delta G_{\text{MD(gaseous)}}| - 0.68 \Delta G_{\text{H}_2\text{O}} - 0.6 \\ &= 0.68 \times (-0.84 + 1.2E + 1.6S - 0.62A - 0.17B + 8.5V) - 0.68 \times (0.7 + 0.30E + \\ &\quad 0.42S - 0.75A + 0.19B + 2.6V) - 0.6 \\ &= (0.81E + 1.1S - 0.42A - 0.12B + 5.8V) + (-0.21E - 0.28S + 0.51A - 0.13B - \\ &\quad 1.7V) - 1.6 \end{aligned} \quad (10)$$

For example, the water contribution ( $P_{eE, \text{H}_2\text{O}}$ ) of  $eE$  term to  $\log K$  in eq. (10) can be estimated as:

$$P_{eE, H_2O} = \frac{(\sum_{i=1}^n e_{H_2O} E_i)}{\sum_{i=1}^n [(e_{H_2O} + e_g)E_i + (s_{H_2O} + s_g)S_i + (a_{H_2O} + a_g)A_i + (b_{H_2O} + b_g)B_i + (v_{H_2O} + v_g)V_i + nc]} \quad (11)$$

where  $e_{H_2O}E_i$ ,  $s_{H_2O}S_i$ ,  $a_{H_2O}A_i$ ,  $b_{H_2O}B_i$  and  $v_{H_2O}V_i$  represent water components of five interaction terms for compound  $i$ , which correspond to -0.21 $E$ , -0.28 $S$ , 0.51 $A$ , -0.13 $B$  and -1.7 $V$  in eq. (10), respectively;  $e_gE_i$ ,  $s_gS_i$ ,  $a_gA_i$ ,  $b_gB_i$  and  $v_gV_i$  represent the interaction in gaseous phase of the five terms for compound  $i$ , which correspond to 0.81 $E$ , 1.1 $S$ , -0.42 $A$ , -0.12 $B$  and 5.8 $V$  in eq. (10), respectively;  $n$  represents the number of the compounds;  $c$  is intercept term, which corresponds to -1.6 in eq. (10).

### pp-LFER models for logK of BP and graphene.

pp-LFER models on logK of BP and graphene in gaseous and aqueous phases are as follows:

Gaseous phase, BP:

$$\log K = 0.2 - 0.38E - 0.44S - 0.63A - 0.12B + 1.6L \quad (12)$$

$$n = 30, R^2_{adj} = 0.97, RMSE = 0.28, Q^2_{LOO} = 0.96, Q^2_{kfold (k=5, 5000)} = 0.96$$

Aqueous phase, BP:

$$\log K = -1.8 + 0.37E + 1.4S + 0.20A - 1.2B + 4.2V \quad (13)$$

$$n = 30, R^2_{adj} = 0.87, RMSE = 0.45, Q^2_{LOO} = 0.83, Q^2_{kfold (k=5, 5000)} = 0.82$$

Gaseous phase, Graphene:

$$\log K = 0.052 - 0.043E - 0.62S - 0.78A - 0.36B + 1.5L \quad (14)$$

$$n = 30, R^2_{adj} = 0.97, RMSE = 0.31, Q^2_{LOO} = 0.96, Q^2_{kfold (k=5, 5000)} = 0.95$$

Aqueous phase, Graphene:

$$\log K = -1.6 + 0.42E + 1.0S + 0.26A - 0.78B + 4.0V \quad (15)$$

$$n = 30, R^2_{adj} = 0.86, RMSE = 0.43, Q^2_{LOO} = 0.80, Q^2_{kfold (k=5, 5000)} = 0.79$$

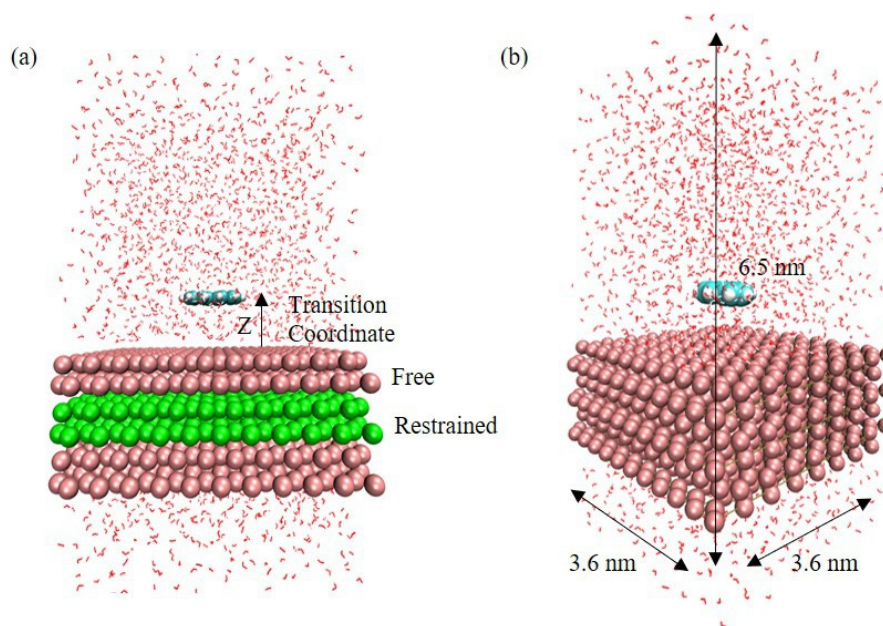

Figure S1. Construction of adsorption system for MD simulation. **(a)** System setup for performing the free energy calculation. **(b)** Initial configuration of the compound-BP adsorption system in aqueous phase.

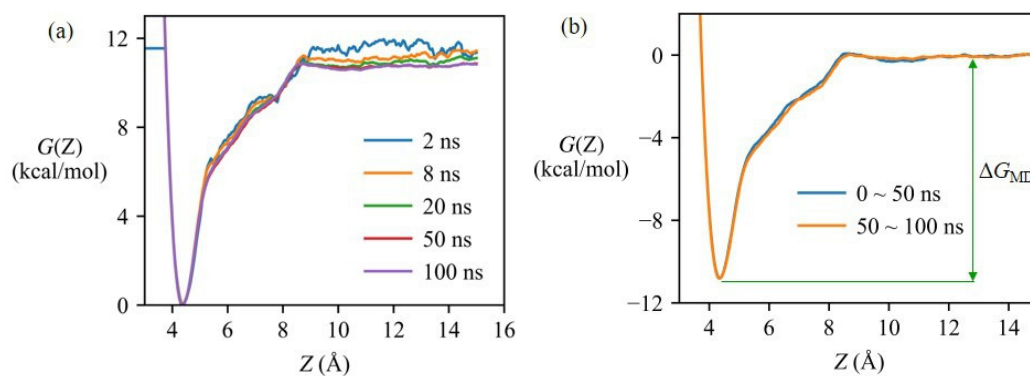

Figure S2. Convergence analysis of free energy [ $G(Z)$ ]. **(a)** Curves of  $G(Z)$  sampled at 2 ~ 100 ns. **(b)** A comparison of normalized  $G(Z)$  sampled at 0 ~ 50 and 50 ~ 100 ns ( $\Delta G_{MD}$  is the difference in  $G$  between that at position of the minimum  $G$  and that at far from the nanomaterial surface.)

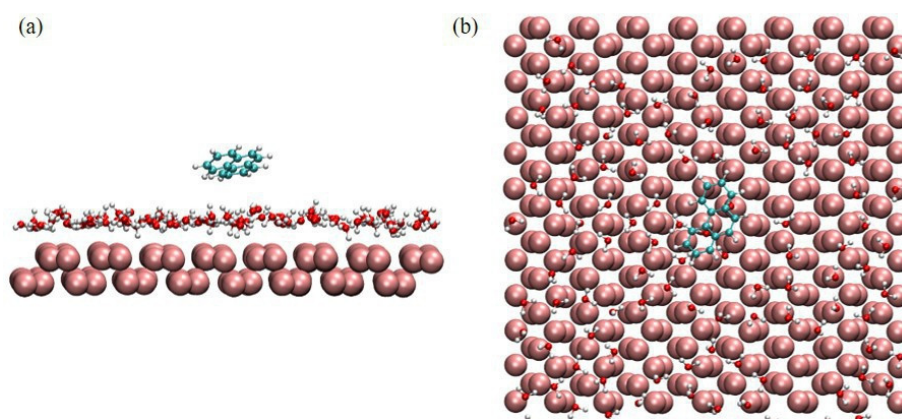

Figure S3. Water molecules onto BP surface (**a**: side view; **b**: top view; pink balls: P atoms; green balls: C atoms; red balls: O atoms; white balls: H atoms.)

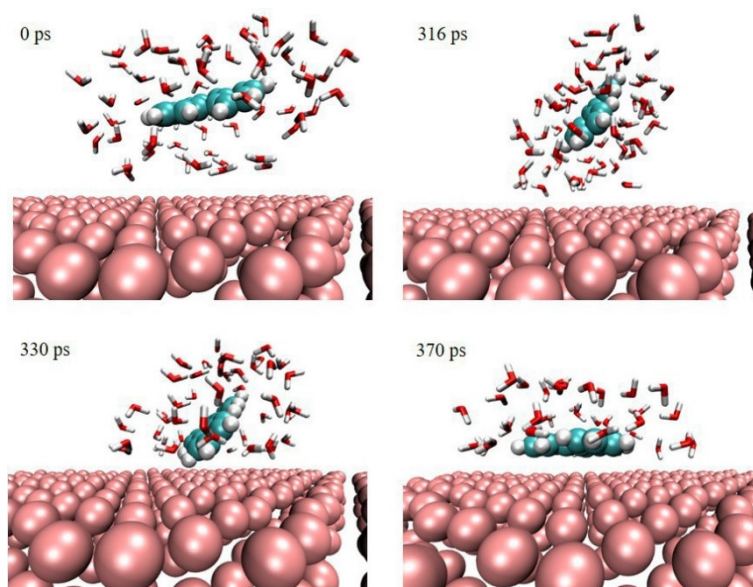

Figure S4. Representative trajectory snapshots of the adsorption of phenanthrene onto BP (For clarity, only water molecules within 5 Å of phenanthrene were shown.)

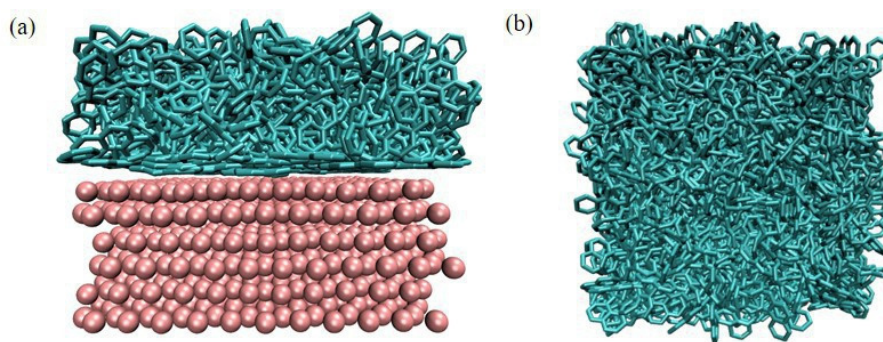

Figure S5. Superimposed conformations of phenanthrene sampled in free energy calculations (**a**: side view; **b**: top view; pink balls: P atoms; green bars: phenanthrene.)

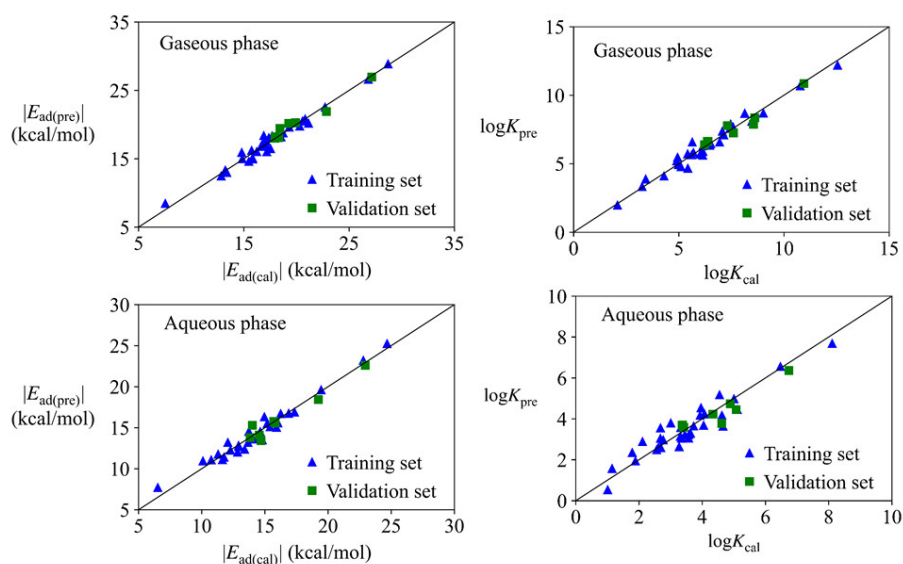

Figure S6. Plots of the pp-LFER models predicted  $|E_{ad(pre)}|$  or  $\log K_{pre}$  versus DFT or MD calculated  $|E_{ad(cal)}|$  or  $\log K_{cal}$  in the gaseous and aqueous phases.

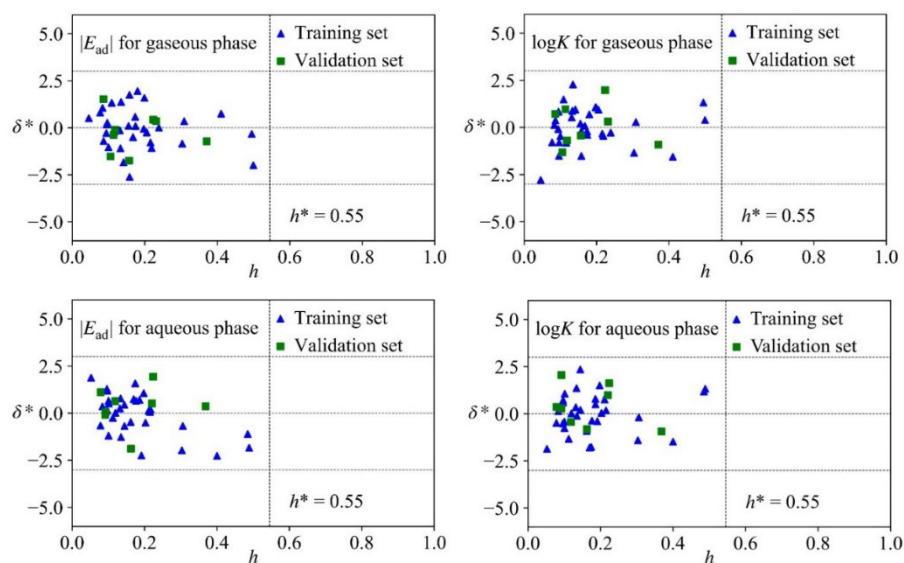

Figure S7. Williams plots of standardized residuals ( $\delta^*$ ) *versus* leverage ( $h$ ) for the pp-LFER models on  $|E_{ad}|$  or  $\log K$  in the gaseous and aqueous phases.

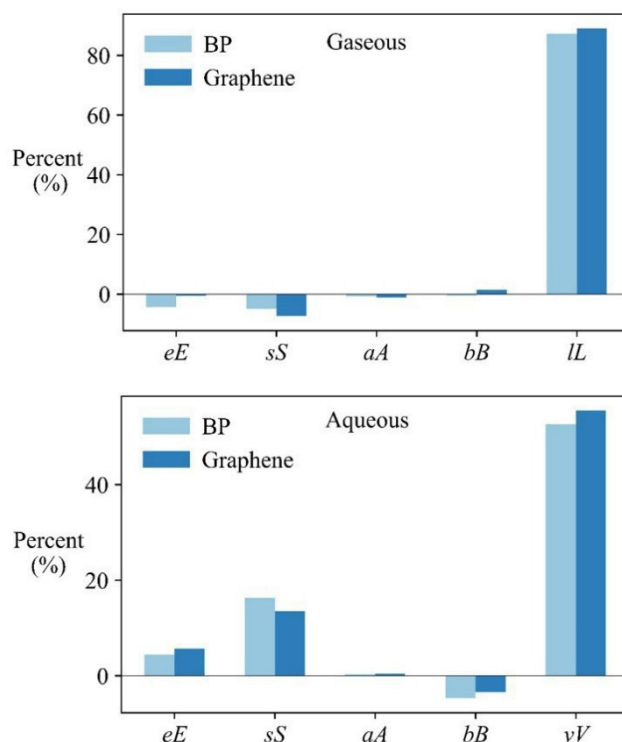

Figure S8. Average contributions of each term of pp-LFER to the overall adsorption ( $\log K$ ) of BP and graphene.

**Table S1. MD calculated logK and DFT calculated  $|E_{ad}|$  values for the adsorption of 41 compounds onto BP in the aqueous and gaseous phases.**

| Name                | Gaseous                 |                   | Aqueous    |      | <sup>c</sup> Group |
|---------------------|-------------------------|-------------------|------------|------|--------------------|
|                     | <sup>a</sup> $ E_{ad} $ | <sup>b</sup> logK | $ E_{ad} $ | logK |                    |
| ethylbenzene        | 16.6                    | 5.6               | 13.7       | 2.7  | T                  |
| benzonitrile        | 15.5                    | 6.1               | 11.8       | 3.6  | T                  |
| propylbenzene       | 16.9                    | 6.3               | 15.0       | 3.4  | T                  |
| p-xylene            | 17.1                    | 6.1               | 14.6       | 3.3  | T                  |
| 4-chlorotoluene     | 17.2                    | 6.1               | 14.1       | 3.4  | T                  |
| 4-chlorophenylamine | 18.5                    | 5.6               | 14.8       | 2.7  | T                  |
| m-cresol            | 17.4                    | 6.0               | 13.8       | 3.3  | T                  |
| 3-chlorophenol      | 16.8                    | 5.7               | 12.9       | 3.6  | T                  |
| 3,5-dimethylphenol  | 21.1                    | 6.9               | 16.0       | 4.0  | T                  |
| bromobenzene        | 16.2                    | 5.4               | 13.7       | 2.8  | T                  |
| toluene             | 15.8                    | 5.0               | 12.9       | 2.6  | T                  |
| chlorobenzene       | 14.9                    | 4.9               | 12.3       | 2.6  | T                  |
| phenol              | 14.8                    | 5.1               | 11.3       | 2.7  | T                  |



|                         |      |      |      |     |   |
|-------------------------|------|------|------|-----|---|
| anthracene              | 26.8 | 10.8 | 22.8 | 6.5 | T |
| 2,4-dinitrotoluene      | 20.1 | 9.0  | 15.2 | 5.0 | T |
| phenyl acetate          | 17.1 | 6.5  | 14.4 | 3.0 | T |
| pyrene                  | 28.7 | 12.5 | 24.7 | 8.1 | T |
| malonic acid            | 13.4 | 3.4  | 6.5  | 1.8 | T |
| 4-fluorophenol          | 15.8 | 5.4  | 11.6 | 3.3 | T |
| 1,2-dinitrobenzene      | 17.1 | 7.5  | 12.1 | 4.0 | T |
| 3-bromophenol           | 17.7 | 6.1  | 13.8 | 3.7 | T |
| iodobenzene             | 16.9 | 6.2  | 15.9 | 3.3 | T |
| aniline                 | 17.5 | 4.9  | 13.4 | 2.1 | T |
| benzene                 | 13.2 | 4.3  | 10.1 | 1.9 | T |
| isoprene                | 12.9 | 3.3  | 10.8 | 1.1 | T |
| methyl-2-methylbenzoate | 20.6 | 7.4  | 17.3 | 4.1 | T |
| naphthalene             | 20.3 | 7.1  | 16.2 | 3.9 | T |
| biphenyl                | 22.7 | 8.1  | 19.4 | 4.5 | T |
| methylbenzoate          | 19.3 | 7.1  | 15.4 | 4.7 | T |

|                              |      |      |      |     |   |
|------------------------------|------|------|------|-----|---|
| ethylbenzoate                | 20.8 | 7.6  | 16.9 | 4.6 | T |
| nitrobenzene                 | 15.7 | 6.5  | 12.8 | 3.6 | T |
| acetaldehyde                 | 7.5  | 2.1  | 4.7  | 1.0 | T |
| 1,3-dinitrobenzene           | 18.7 | 8.5  | 14.3 | 5.1 | T |
| acetophenone                 | 18.0 | 6.4  | 14.6 | 3.4 | V |
| 4-nitrotoluene               | 18.0 | 7.6  | 13.8 | 4.6 | V |
| 1-methylnaphthalene          | 22.8 | 8.6  | 19.2 | 4.9 | V |
| 4-chloroacetophenone         | 19.3 | 7.3  | 15.7 | 4.3 | V |
| 4-ethylphenol                | 18.4 | 6.2  | 14.0 | 3.4 | V |
| (3-methylphenyl)<br>methanol | 19.9 | 6.4  | 15.8 | 3.4 | V |
| phenanthrene                 | 27.1 | 11.0 | 22.9 | 6.7 | V |
| 1,4-dinitrobenzene           | 18.3 | 8.5  | 14.7 | 5.1 | V |

---

<sup>a</sup>  $|E_{\text{ad}}|$  is an absolute value of the adsorption energy  $E_{\text{ad}}$  (kcal/mol); <sup>b</sup>  $\log K$  ( $K$ , mL/g) is a logarithm of the adsorption equilibrium constant; <sup>c</sup> T and V represent training set and validation set, respectively.

**Table S2. Comparison of experimental and DFT calculated  $E_{\text{ad}}$  values for adsorption of organic compounds onto graphene in the gaseous phase.**

| Name         | <sup>a</sup> Experimental $E_{\text{ad}}$<br>(kcal/mol) | Calculated $E_{\text{ad}}$<br>(kcal/mol) | Absolute Error |
|--------------|---------------------------------------------------------|------------------------------------------|----------------|
| Acetonitrile | $-7.6 \pm 0.3$                                          | -7.0                                     | 0.6            |
| Benzene      | $-11.9 \pm 0.3$                                         | -12.0                                    | 0.1            |
| 1,4-Dioxane  | $-10.8 \pm 0.1$                                         | -10.7                                    | 0.1            |
| ethanol      | $-7.3 \pm 0.7$                                          | -8.1                                     | 0.8            |
| toluene      | $-13.8 \pm 0.4$                                         | -14.6                                    | 0.8            |

<sup>a</sup> The experimental  $E_{\text{ad}}$  values are from other literature [3,4].

**Table S3. Comparison of experimental and MD calculated values for adsorption of aromatic compounds onto graphene in the aqueous phase.**

| Name               | <sup>a</sup> $\log K_{\text{exp}}$ | <sup>b</sup> $\Delta G_{\text{MD}}$ | <sup>c</sup> $\log K_{\text{cal}}$ |
|--------------------|------------------------------------|-------------------------------------|------------------------------------|
| nitrobenzene       | 4.0                                | -6.3                                | 3.6                                |
| naphthalene        | 4.9                                | -6.8                                | 3.9                                |
| 1,3-nitrotoluene   | 4.7                                | -7.1                                | 4.1                                |
| 1-naphthylamine    | 4.8                                | -6.9                                | 4.0                                |
| 2-naphthol         | 4.5                                | -8.0                                | 4.8                                |
| 1,3-dinitrobenzene | 4.7                                | -7.8                                | 4.6                                |
| phenanthrene       | 5.5                                | -10.0                               | 6.2                                |

|                                   |     |       |     |
|-----------------------------------|-----|-------|-----|
| 2-chlorobiphenyl                  | 5.8 | -7.4  | 4.5 |
| 3-chlorobiphenyl                  | 6.4 | -8.7  | 5.3 |
| 2,4'-dichlorobiphenyl             | 6.0 | -7.7  | 4.7 |
| bisphenol A                       | 4.6 | -6.4  | 3.8 |
| 2,2',5,5'-tetrachlorobiphenyl     | 7.1 | -7.5  | 4.5 |
| 2,3',5,5'-tetrachlorobiphenyl     | 7.5 | -9.1  | 5.7 |
| 2,3,3',4,4',5-hexachlorobiphenyl  | 8.8 | -10.0 | 6.4 |
| 3,3',4,4',5,5'-hexachlorobiphenyl | 9.6 | -14.1 | 9.1 |

<sup>a</sup> The experimental  $\log K_{\text{exp}}$  values are from other literature [5]. <sup>b,c</sup> The adsorption free energy ( $\Delta G_{\text{MD}}$ , kcal/mol) and  $\log K_{\text{cal}}$  ( $K$ , mL/g) of the aromatic compounds onto graphene were calculated by MD integrated with an adaptive biasing force (ABF) method in this study.

**Table S4. Refined charge parameters for methyl-2-methylbenzoate.**

| Atom Name | CGenFF Atom Type | Original Partial Charge (e) | Refined Partial Charge (e) |
|-----------|------------------|-----------------------------|----------------------------|
| O1        | OG302            | -0.306                      | -0.306                     |
| O2        | OG2D1            | -0.482                      | -0.482                     |
| C1        | CG2R61           | 0.004                       | 0.282                      |
| C2        | CG2R61           | 0.080                       | -0.453                     |
| C3        | CG2R61           | -0.116                      | -0.116                     |
| C4        | CG2R61           | -0.110                      | -0.110                     |
| C5        | CG331            | -0.266                      | -0.358                     |
| C6        | CG2R61           | -0.115                      | -0.115                     |
| C7        | CG2R61           | -0.115                      | -0.115                     |

|     |       |        |        |
|-----|-------|--------|--------|
| C8  | CG2O2 | 0.462  | 0.809  |
| C9  | CG331 | -0.036 | -0.036 |
| H1  | HGR61 | 0.115  | 0.115  |
| H2  | HGR61 | 0.115  | 0.115  |
| H3  | HGA3  | 0.090  | 0.090  |
| H4  | HGA3  | 0.090  | 0.090  |
| H5  | HGA3  | 0.090  | 0.090  |
| H6  | HGR61 | 0.115  | 0.115  |
| H7  | HGR61 | 0.115  | 0.115  |
| H8  | HGA3  | 0.090  | 0.090  |
| H9  | HGA3  | 0.090  | 0.090  |
| H10 | HGA3  | 0.090  | 0.090  |

The Force Field Toolkit (ffTK) [6] was employed to further refine the CHARMM-compatible parameters.

**Table S5. Refined dihedral parameters for methyl-2-methylbenzoate.**

|                     | Atom1 | Atom2  | Atom3  | Atom4 | $n$ | $K_{\phi}$<br>(kcal/mol) | $\delta$<br>(degrees) |
|---------------------|-------|--------|--------|-------|-----|--------------------------|-----------------------|
| Original Parameters | CG2O2 | CG2R61 | CG2R61 | CG331 | 2   | 2.4000                   | 180.00                |
| Refined Parameters  | CG2O2 | CG2R61 | CG2R61 | CG331 | 2   | 3.0000                   | 180.00                |

The Force Field Toolkit (ffTK) [6] was employed to further refine the CHARMM-compatible parameters.

**Table S6. Refined charge parameters for 2,4-dinitrotoluene.**

| Atom Name | CGenFF Atom | Orginal Partial | Refined Partial |
|-----------|-------------|-----------------|-----------------|
|-----------|-------------|-----------------|-----------------|

|    | Type   | Charge<br>(e) | Charge<br>(e) |
|----|--------|---------------|---------------|
| O1 | OG2N1  | 0.000         | -0.340        |
| O2 | OG2N1  | 0.000         | -0.340        |
| O3 | OG2N1  | 0.000         | -0.340        |
| O4 | OG2N1  | 0.000         | -0.340        |
| N1 | NG2O1  | 14.898        | 0.384         |
| N2 | NG2O1  | 0.000         | 0.397         |
| C1 | CG2R61 | 13.121        | -0.033        |
| C2 | CG2R61 | 15.880        | 0.347         |
| C3 | CG2R61 | 0.000         | -0.249        |
| C4 | CG2R61 | 0.000         | 0.325         |
| C5 | CG2R61 | 0.000         | -0.112        |
| C6 | CG2R61 | 0.000         | -0.182        |
| C7 | CG331  | 1.500         | -0.268        |
| H1 | HGR61  | 0.000         | 0.205         |
| H2 | HGR61  | 0.000         | 0.115         |
| H3 | HGR61  | 0.000         | 0.160         |
| H4 | HGA3   | 0.000         | 0.090         |
| H5 | HGA3   | 0.000         | 0.090         |
| H6 | HGA3   | 0.000         | 0.090         |

The Force Field Toolkit (ffTK) [6] was employed to further refine the CHARMM-compatible parameters.

**Table S7. Refined dihedral parameters for 2,4-dinitrotoluene.**

|                     | Atom1 | Atom2  | Atom3  | Atom4 | $n$ | $K_{\phi}$<br>(kcal/mol) | $\delta$<br>(degrees) |
|---------------------|-------|--------|--------|-------|-----|--------------------------|-----------------------|
| Original Parameters | CG331 | CG2R61 | CG2R61 | NG2O1 | 2   | 2.4000                   | 180.00                |
| Refined Parameters  | CG331 | CG2R61 | CG2R61 | NG2O1 | 2   | 3.0000                   | 180.00                |

The Force Field Toolkit (ffTK) [6] was employed to further refine the CHARMM-compatible parameters.

**Table S8. Refined angle parameters for malonic acid.**

|                     | Atom1 | Atom2 | Atom3 | $K_{\theta}$<br>(kcal/mol/rad <sup>2</sup> ) | $\theta_0$<br>(degree) |
|---------------------|-------|-------|-------|----------------------------------------------|------------------------|
| Original Parameters | CG2O2 | CG321 | CG2O2 | 51.800                                       | 107.500                |
| Refined Parameters  | CG2O2 | CG321 | CG2O2 | 94.930                                       | 125.229                |

The Force Field Toolkit (ffTK) [6] was employed to further refine the CHARMM-compatible parameters.

**Table S9. Refined dihedral parameters for malonic acid.**

|                     | Atom1 | Atom2 | Atom3 | Atom4 | $n$ | $K_{\phi}$<br>(kcal/mol) | $\delta$<br>(degrees) |
|---------------------|-------|-------|-------|-------|-----|--------------------------|-----------------------|
| Original Parameters | OG2D1 | CG2O2 | CG321 | CG2O2 | 1   | 0.0000                   | 0.0000                |
| Original Parameters | OG311 | CG2O2 | CG321 | CG2O2 | 1   | 0.0000                   | 0.0000                |

|                    |       |       |       |       |   |        |        |
|--------------------|-------|-------|-------|-------|---|--------|--------|
| Refined Parameters | OG2D1 | CG2O2 | CG321 | CG2O2 | 1 | 0.4450 | 0.0000 |
| Refined Parameters | OG311 | CG2O2 | CG321 | CG2O2 | 1 | 0.5710 | 0.0000 |

The Force Field Toolkit (ffTK) [6] was employed to further refine the CHARMM-compatible parameters.

**Table S10. Refined dihedral parameters for 1,2-dinitrobenzene.**

|                     | Atom1 | Atom2  | Atom3  | Atom4 | $n$ | $K_{\phi}$<br>(kcal/mol) | $\delta$<br>(degrees) |
|---------------------|-------|--------|--------|-------|-----|--------------------------|-----------------------|
| Original Parameters | NG2O1 | CG2R61 | CG2R61 | NG2O1 | 2   | 5.0000                   | 180.00                |
| Refined Parameters  | NG2O1 | CG2R61 | CG2R61 | NG2O1 | 2   | 3.0000                   | 180.00                |

The Force Field Toolkit (ffTK) [6] was employed to further refine the CHARMM-compatible parameters.

**Table S11. Adsorption free energy ( $\Delta G_{\text{MD}}$ ) of 41 compounds onto BP in the aqueous and gaseous phases.**

| CAS no.  | Name            | Gaseous                              | Aqueous                              |
|----------|-----------------|--------------------------------------|--------------------------------------|
|          |                 | $\Delta G_{\text{MD}}$<br>(kcal/mol) | $\Delta G_{\text{MD}}$<br>(kcal/mol) |
| 100-41-4 | ethylbenzene    | -9.0                                 | -4.9                                 |
| 100-47-0 | benzonitrile    | -9.7                                 | -6.3                                 |
| 103-65-1 | propylbenzene   | -9.9                                 | -5.8                                 |
| 106-42-3 | p-xylene        | -9.6                                 | -6.0                                 |
| 106-43-4 | 4-chlorotoluene | -9.8                                 | -6.1                                 |



|          |                         |       |       |
|----------|-------------------------|-------|-------|
| 106-47-8 | 4-chlorophenylamine     | -9.1  | -5.0  |
| 108-39-4 | m-cresol                | -9.6  | -6.0  |
| 108-43-0 | 3-chlorophenol          | -9.1  | -6.3  |
| 108-68-9 | 3,5-dimethylphenol      | -10.9 | -7.0  |
| 108-86-1 | bromobenzene            | -8.7  | -5.0  |
| 108-88-3 | toluene                 | -8.1  | -4.8  |
| 108-90-7 | chlorobenzene           | -8.0  | -4.8  |
| 108-95-2 | phenol                  | -8.4  | -5.0  |
| 120-12-7 | anthracene              | -16.3 | -10.4 |
| 121-14-2 | 2,4-dinitrotoluene      | -13.8 | -8.3  |
| 122-79-2 | phenyl acetate          | -10.2 | -5.5  |
| 129-00-0 | pyrene                  | -18.8 | -12.7 |
| 141-82-2 | malonic acid            | -5.8  | -3.4  |
| 371-41-5 | 4-fluorophenol          | -8.8  | -5.9  |
| 528-29-0 | 1,2-dinitrobenzene      | -11.6 | -6.8  |
| 591-20-8 | 3-bromophenol           | -9.7  | -6.5  |
| 591-50-4 | iodobenzene             | -9.8  | -5.8  |
| 62-53-3  | aniline                 | -8.1  | -4.1  |
| 71-43-2  | benzene                 | -7.1  | -3.8  |
| 78-79-5  | isoprene                | -5.6  | -2.4  |
| 89-71-4  | methyl-2-methylbenzoate | -11.6 | -7.0  |
| 91-20-3  | naphthalene             | -11.1 | -6.8  |
| 92-52-4  | biphenyl                | -12.5 | -7.6  |
| 93-58-3  | methylbenzoate          | -11.2 | -7.8  |
| 93-89-0  | ethylbenzoate           | -11.9 | -7.8  |
| 98-95-3  | nitrobenzene            | -10.2 | -6.3  |

|          |                           |       |       |
|----------|---------------------------|-------|-------|
| 75-07-0  | acetaldehyde              | -3.8  | -2.2  |
| 99-65-0  | 1,3-dinitrobenzene        | -13.1 | -8.5  |
| 98-86-2  | acetophenone              | -10.1 | -6.1  |
| 99-99-0  | 4-nitrotoluene            | -11.9 | -7.8  |
| 90-12-0  | 1-methylnaphthalene       | -13.2 | -8.2  |
| 99-91-2  | 4-chloroacetophenone      | -11.4 | -7.4  |
| 123-07-9 | 4-ethylphenol             | -9.9  | -6.0  |
| 587-03-1 | (3-methylphenyl) methanol | -10.0 | -6.0  |
| 85-01-8  | phenanthrene              | -16.6 | -10.8 |
| 100-25-4 | 1,4-dinitrobenzene        | -13.1 | -8.4  |

**Table S12. Theoretical intercept values (logC) in linear relationships between the MD calculated  $\log K_{\text{cal}}$  and  $\Delta G_{\text{MD}}$  for graphene.**

| Name                          | CAS no.    | $\log K_{\text{cal}}$ | $\Delta G_{\text{MD}}$ | logC |
|-------------------------------|------------|-----------------------|------------------------|------|
| nitrobenzene                  | 98-95-3    | 3.6                   | -6.3                   | -1.0 |
| naphthalene                   | 91-20-3    | 3.9                   | -6.8                   | -1.0 |
| 1,3-nitrotoluene              | 99-08-1    | 4.1                   | -7.1                   | -1.0 |
| 1-naphthylamine               | 134-32-7   | 4.0                   | -6.9                   | -1.0 |
| 2-naphthol                    | 135-19-3   | 4.8                   | -8.0                   | -1.1 |
| 1,3-dinitrobenzene            | 99-65-0    | 4.6                   | -7.8                   | -1.1 |
| phenanthrene                  | 85-01-8    | 6.2                   | -10.0                  | -1.1 |
| 2-chlorobiphenyl              | 2051-60-7  | 4.5                   | -7.4                   | -0.8 |
| 3-chlorobiphenyl              | 2051-61-8  | 5.3                   | -8.7                   | -1.0 |
| 2,4'-dichlorobiphenyl         | 33284-50-3 | 4.7                   | -7.7                   | -0.9 |
| bisphenol A                   | 80-05-7    | 3.8                   | -6.4                   | -0.8 |
| 2,2',5,5'-tetrachlorobiphenyl | 35693-99-3 | 4.5                   | -7.5                   | -0.9 |

|                                   |            |     |       |      |
|-----------------------------------|------------|-----|-------|------|
| 2,3',5,5'-tetrachlorobiphenyl     | 41464-42-0 | 5.7 | -9.1  | -0.9 |
| 2,3,3',4,4',5-hexachlorobiphenyl  | 38380-08-4 | 6.4 | -10.0 | -0.9 |
| 3,3',4,4',5,5'-hexachlorobiphenyl | 32774-16-6 | 9.1 | -14.1 | -1.2 |

$\Delta G_{MD}$ : kcal/mol;  $K$ : mL/g;  $C$ : mL/g

**Table S13. Analysis of the conformations of the adsorbates onto BP surface.**

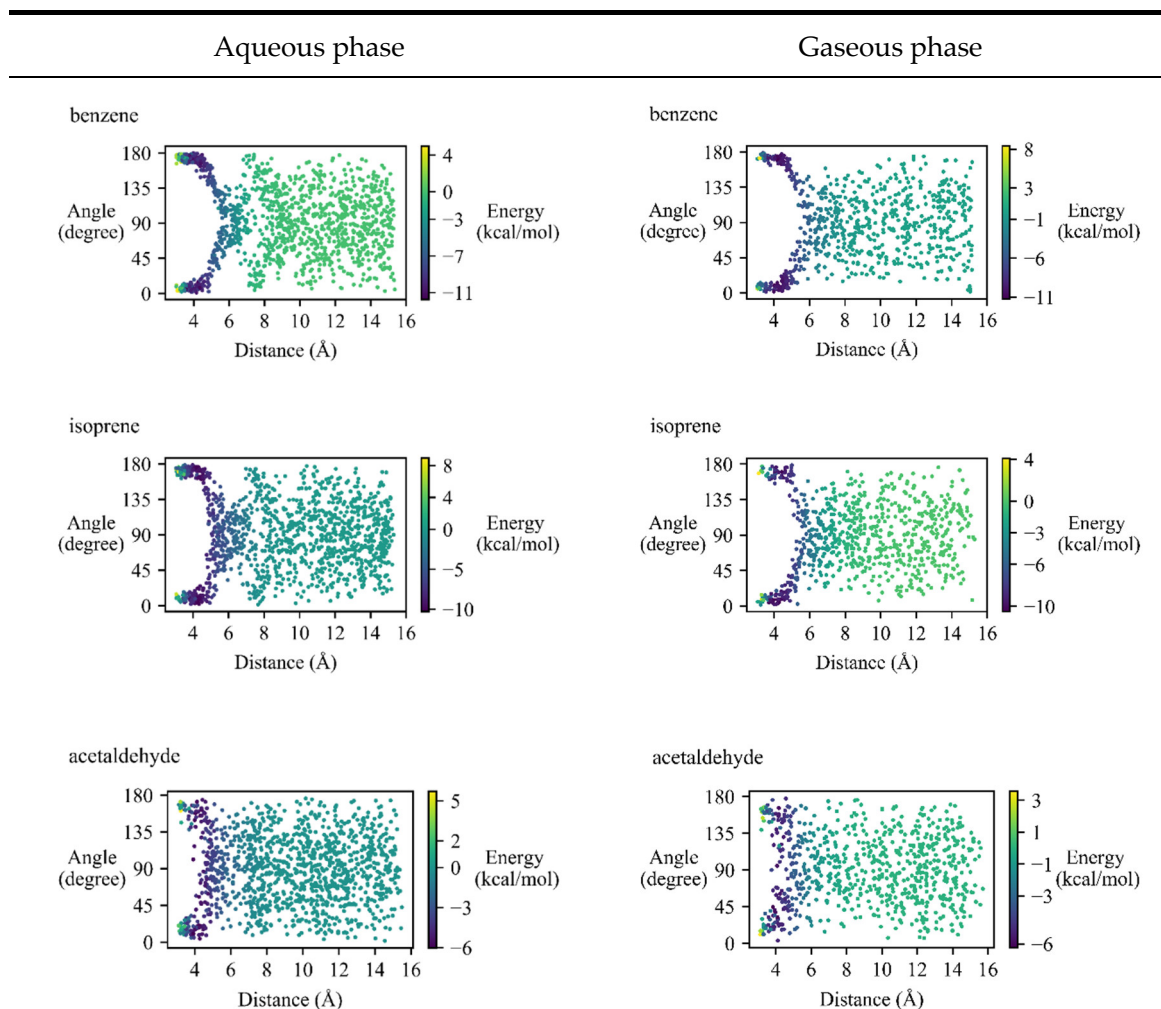

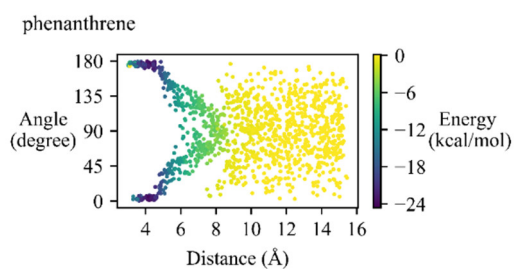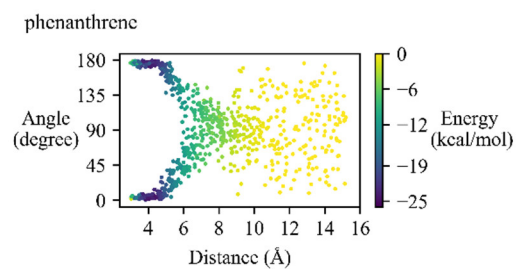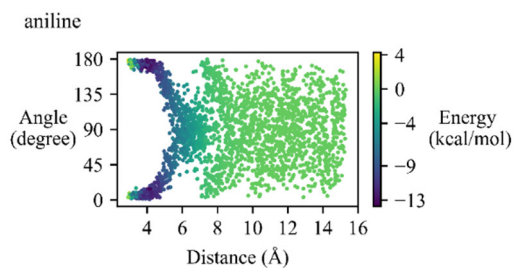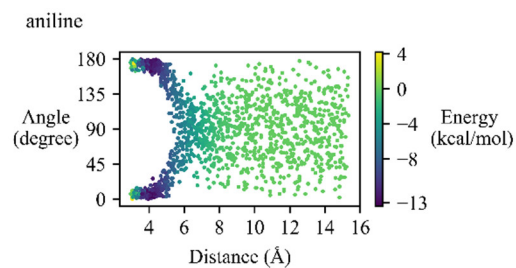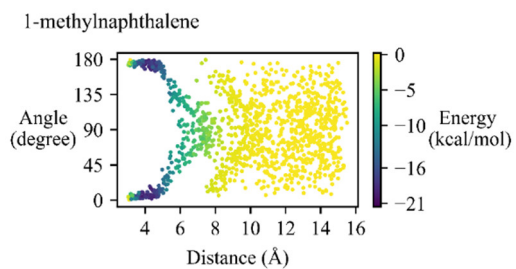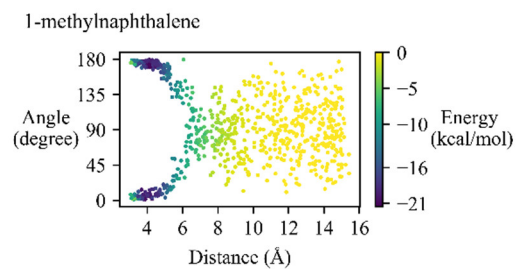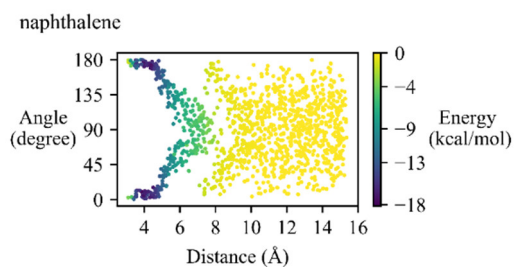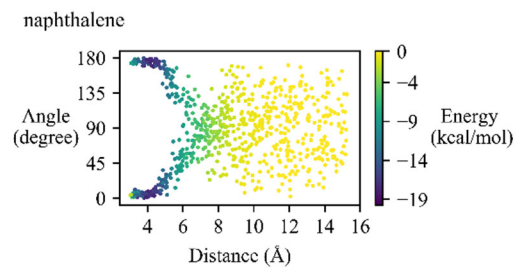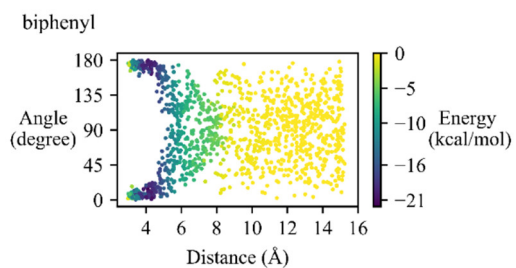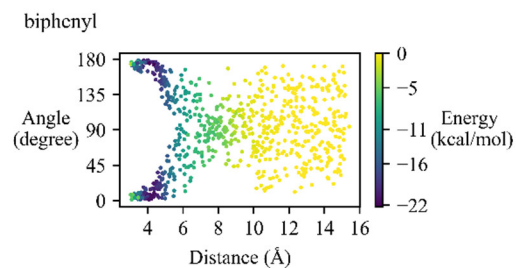



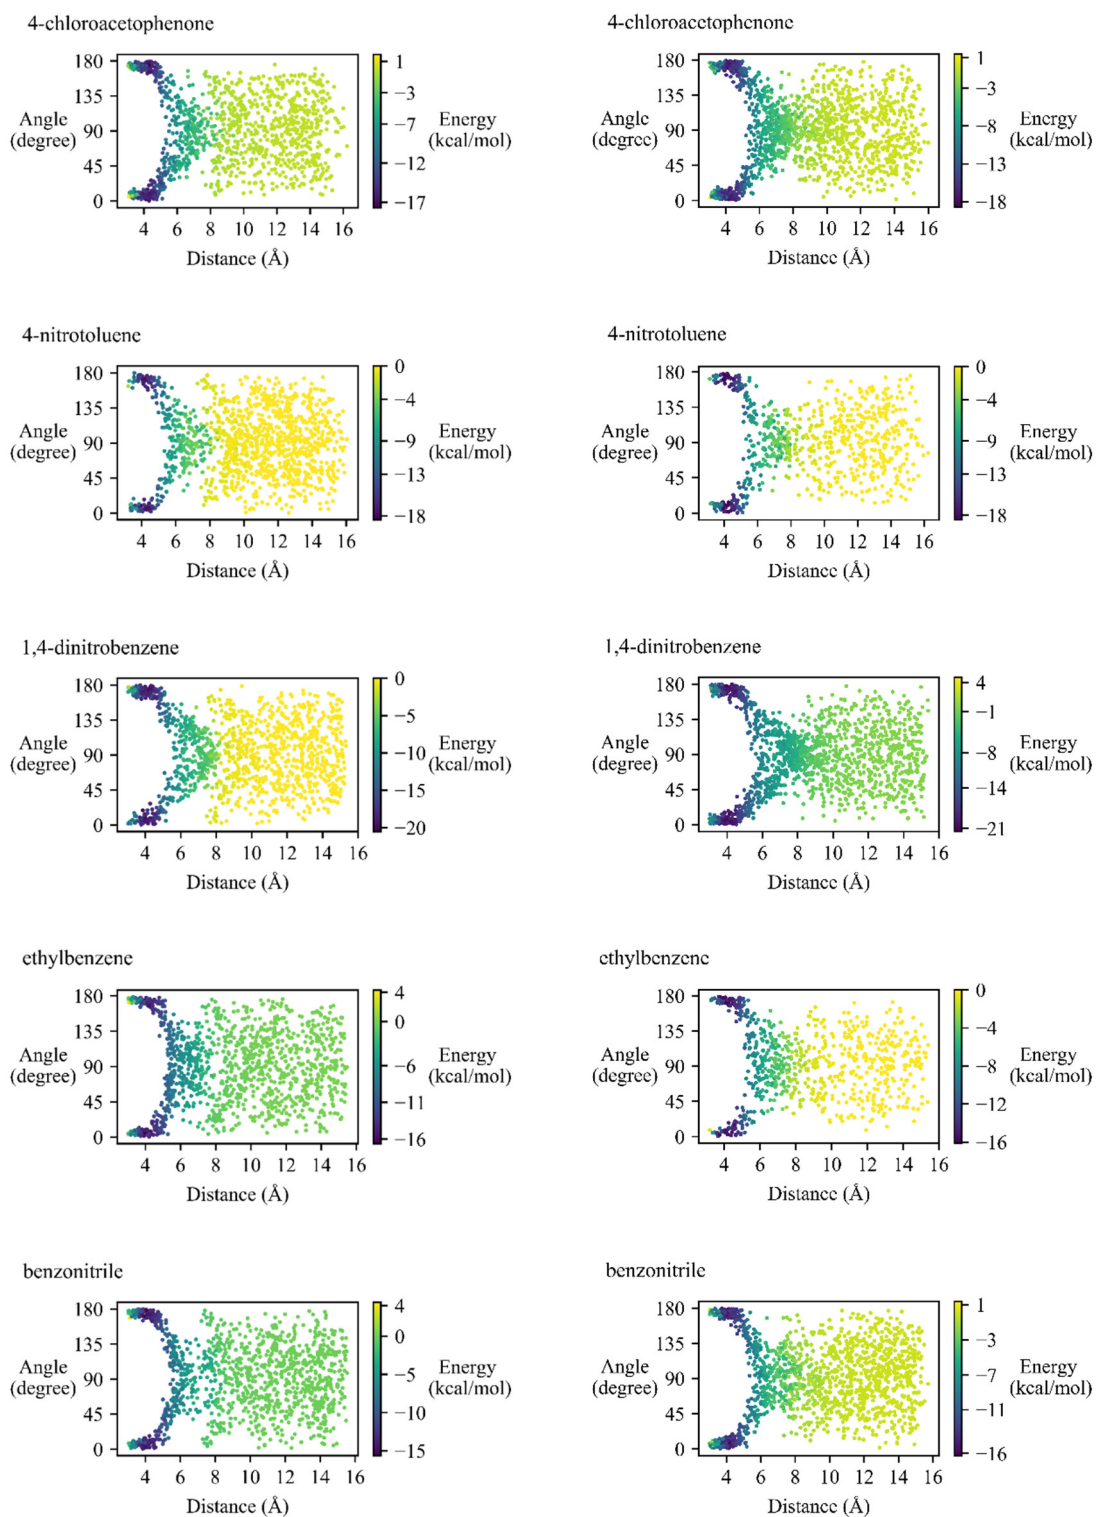



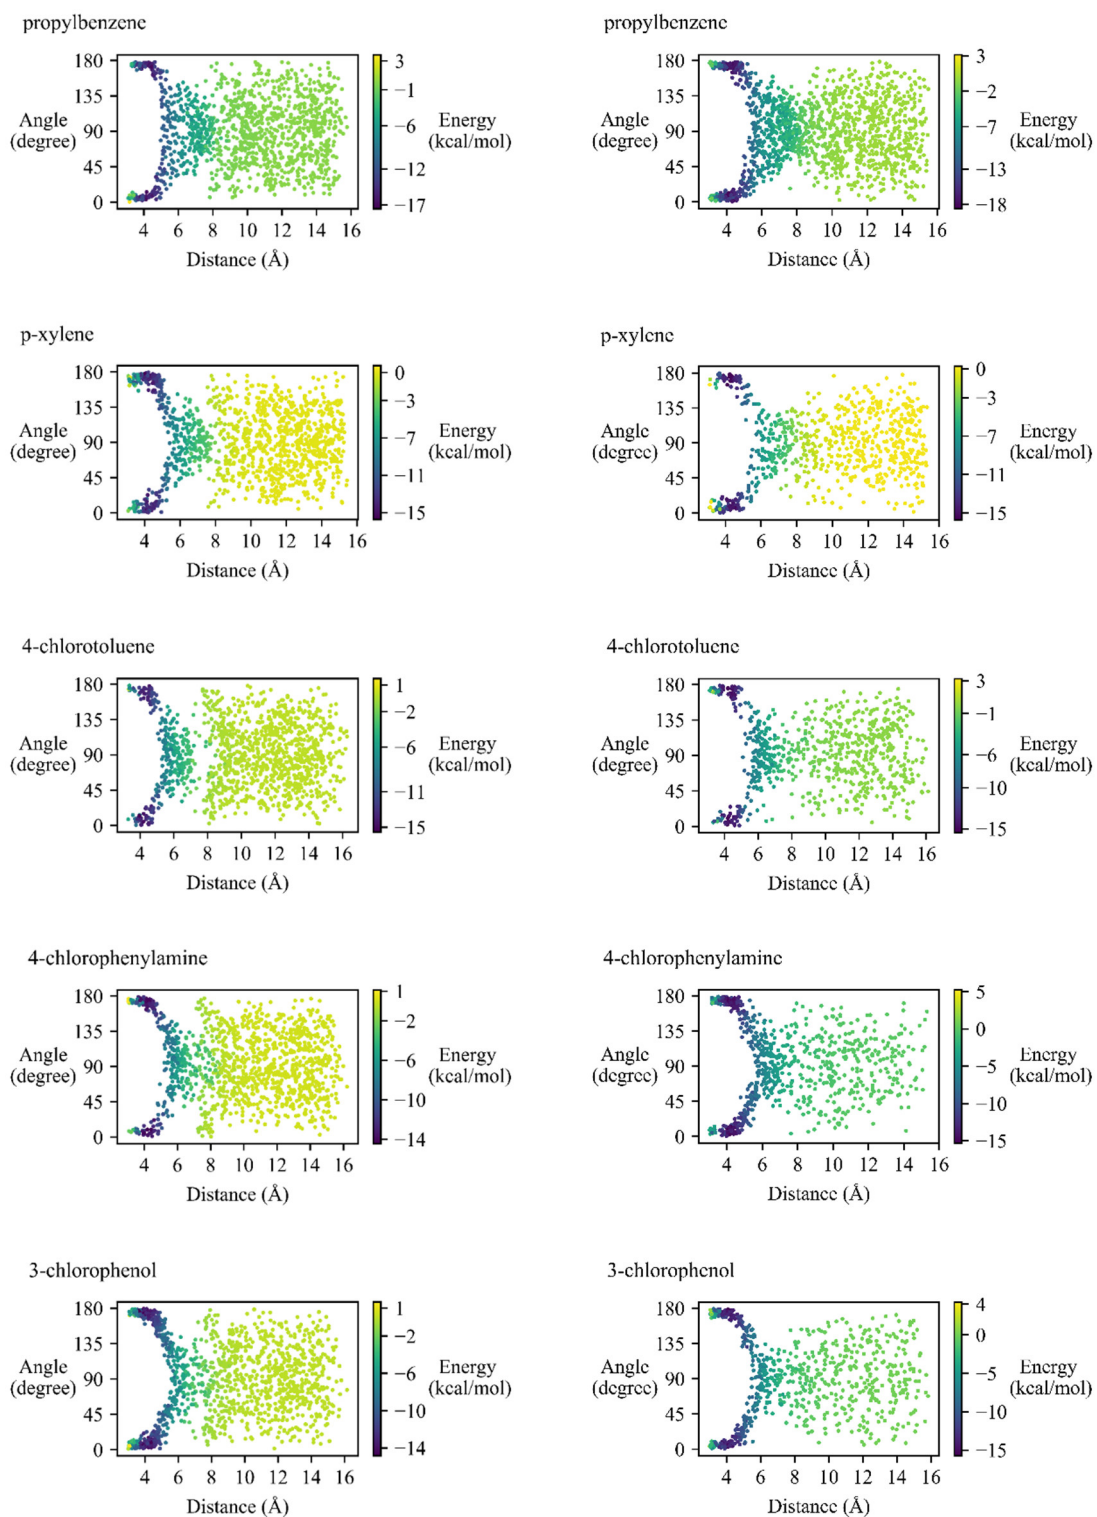

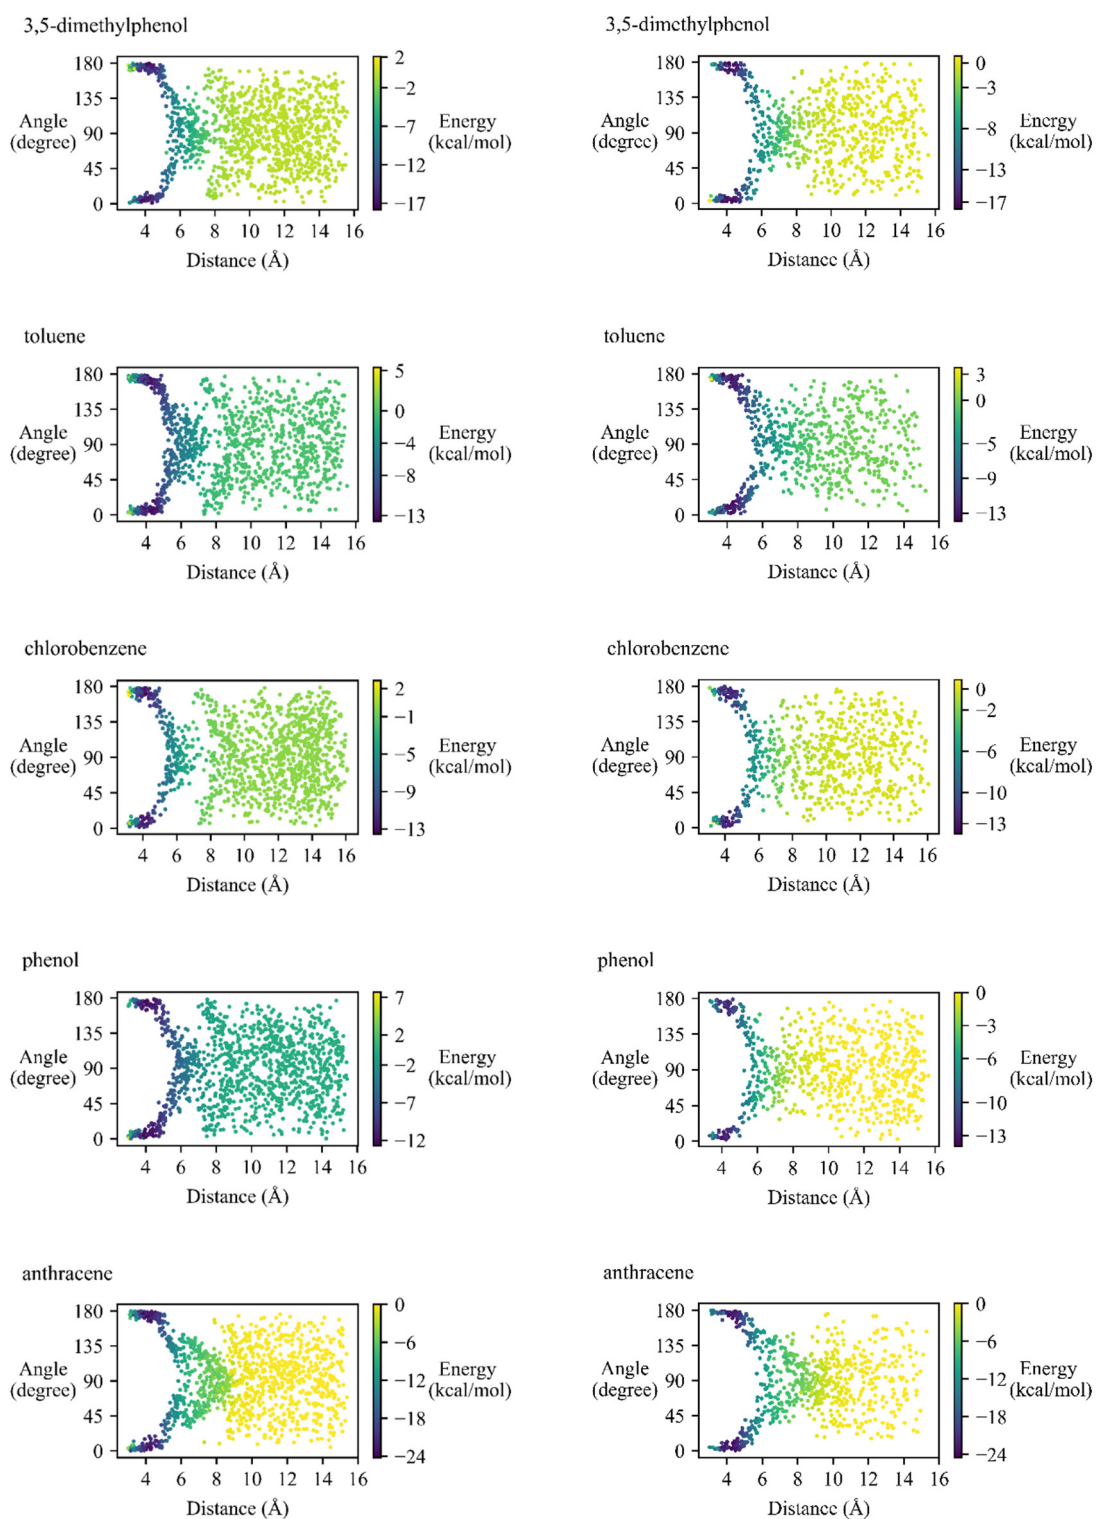



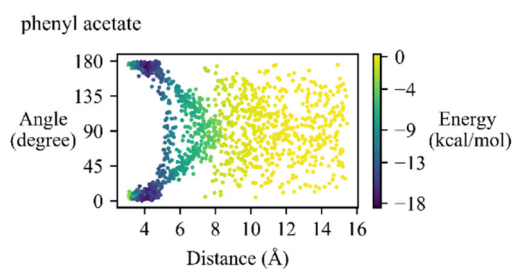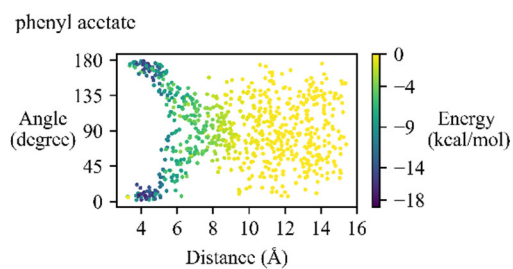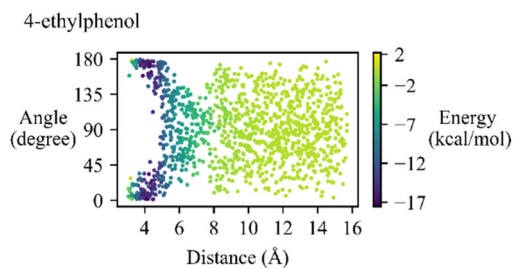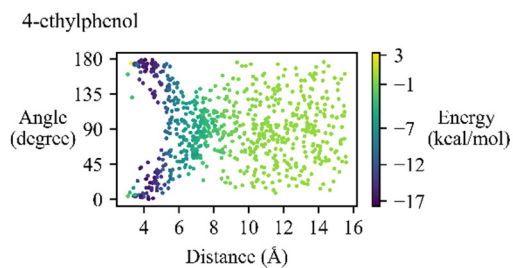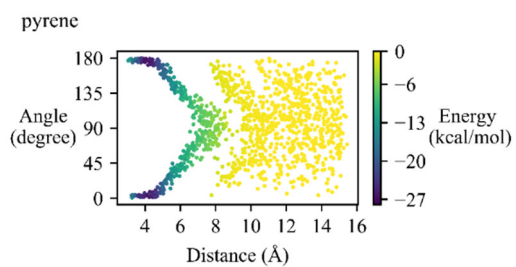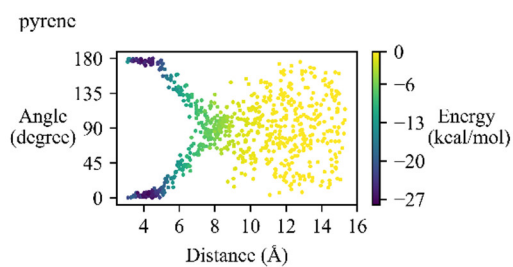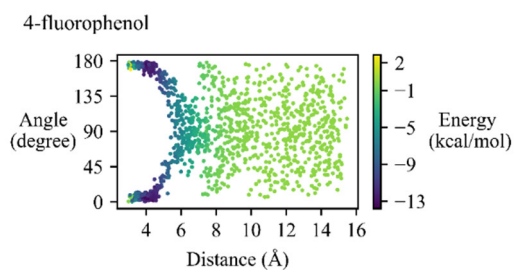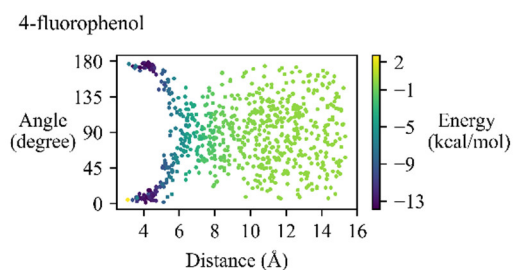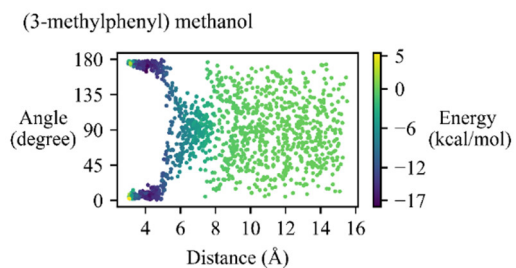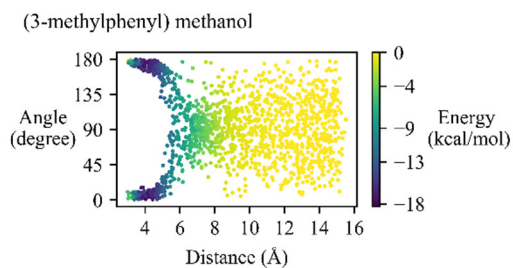

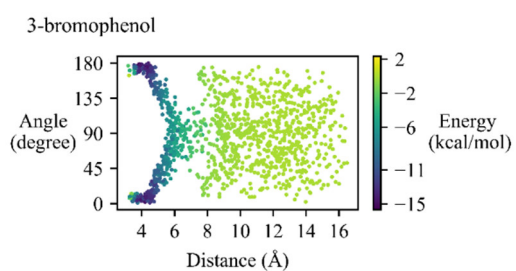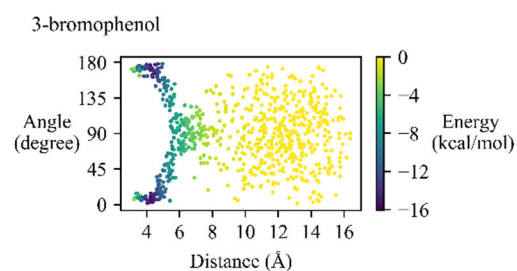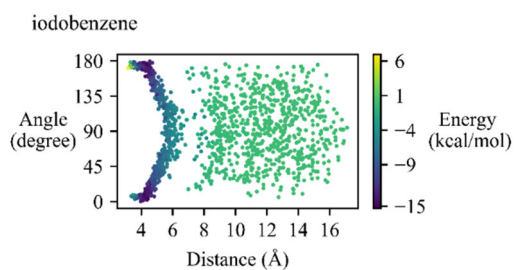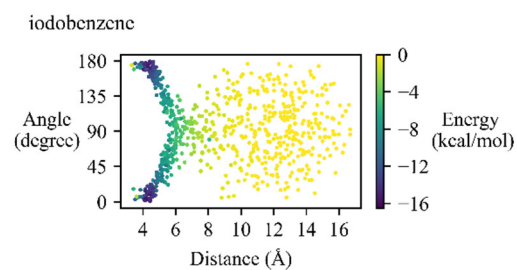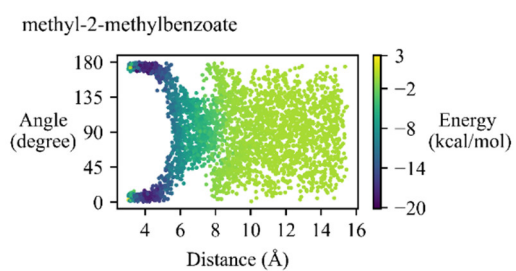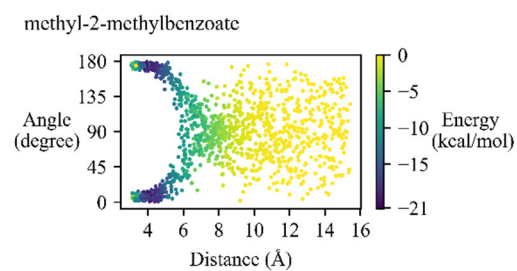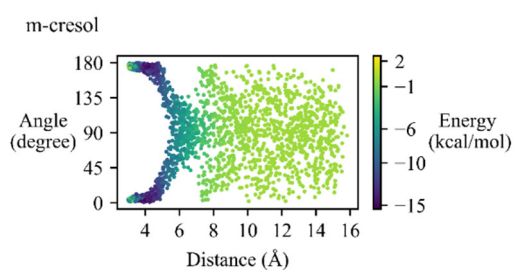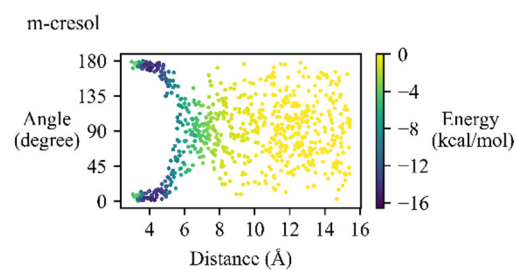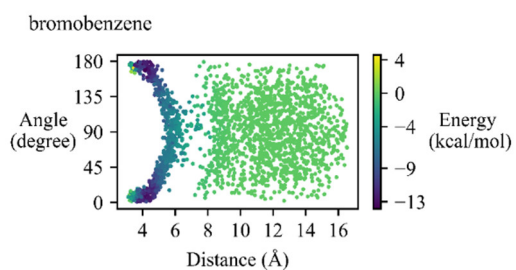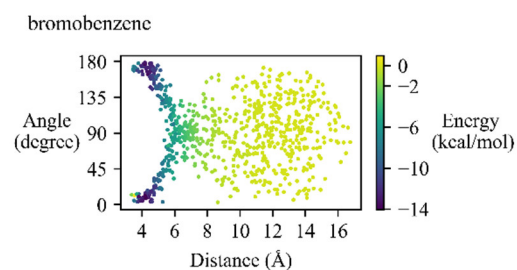

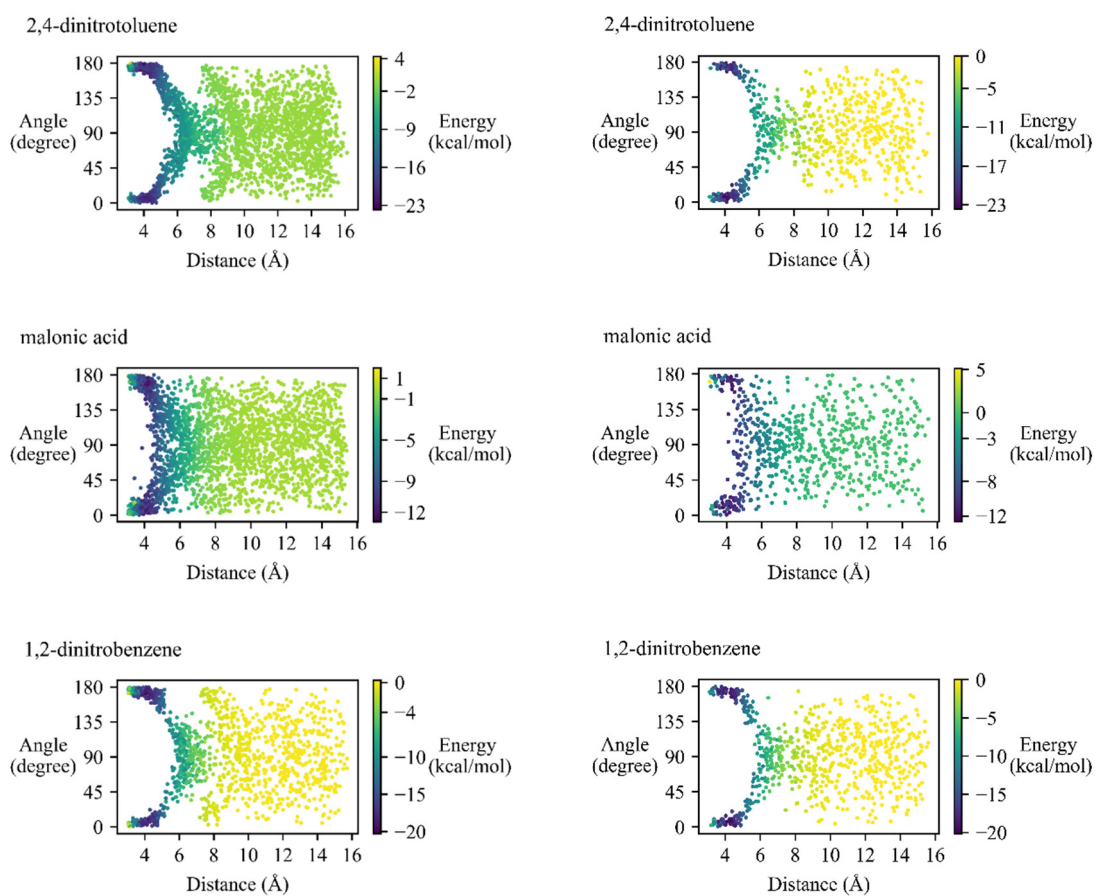


---

The horizontal ordinates in the figures represent vertical distances between the adsorbates and BP, and the vertical ordinates are dihedral angles between the plane formed by the adsorbates and BP surface. The color bars represent values of interaction energies including electrostatic and van der Waals interactions. The dark color corresponds to strong adsorption.

**Table S14. Equilibrium configurations of the adsorbates onto BP surface.**

| Gaseous phase                                                                                                                                 | Aqueous phase                                                                                                                                  |
|-----------------------------------------------------------------------------------------------------------------------------------------------|------------------------------------------------------------------------------------------------------------------------------------------------|
| 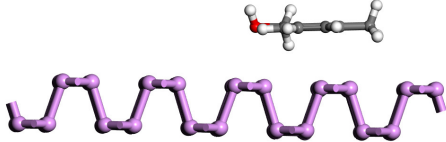 <p><math>d = 4.599</math><br/>(3-methylphenyl) methanol</p> |  <p><math>d = 4.603</math><br/>(3-methylphenyl) methanol</p> |
|  <p><math>d = 4.436</math><br/>acetaldehyde</p>              |  <p><math>d = 4.401</math><br/>acetaldehyde</p>              |
|  <p><math>d = 4.584</math><br/>1,2-dinitrobenzene</p>      |  <p><math>d = 4.553</math><br/>1,2-dinitrobenzene</p>      |
|  <p><math>d = 4.439</math><br/>1,3-dinitrobenzene</p>      |  <p><math>d = 4.434</math><br/>1,3-dinitrobenzene</p>      |

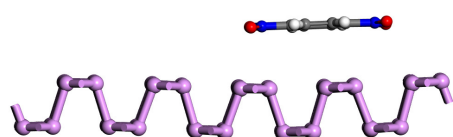

$$d = 4.481$$

1,4-dinitrobenzene

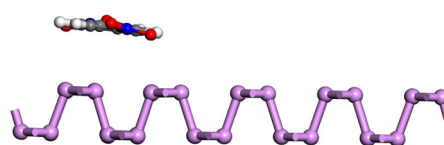

$$d = 4.466$$

1,4-dinitrobenzene

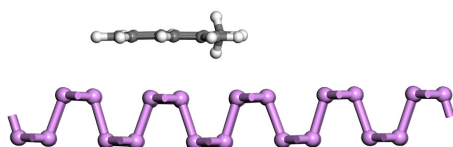

$$d = 4.481$$

1-methylnaphthalene

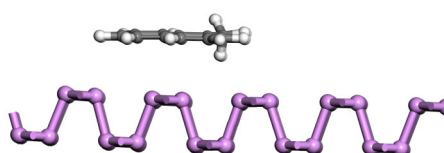

$$d = 4.511$$

1-methylnaphthalene

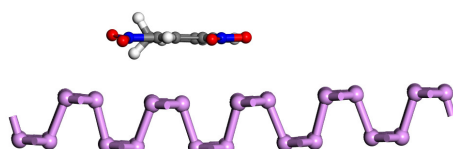

$$d = 4.497$$

2,4-dinitrotoluene

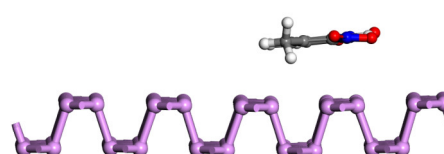

$$d = 4.515$$

2,4-dinitrotoluene

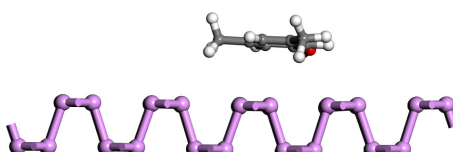

$$d = 4.498$$

3,5-dimethylphenol

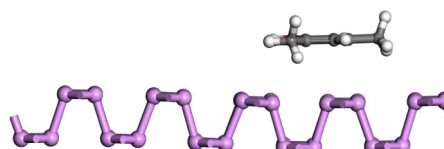

$$d = 4.456$$

3,5-dimethylphenol

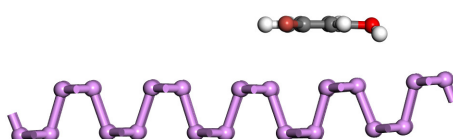

$$d = 4.440$$

3-bromophenol

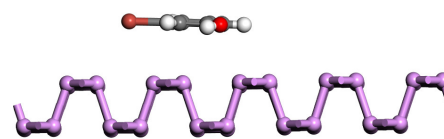

$$d = 4.424$$

3-bromophenol

---

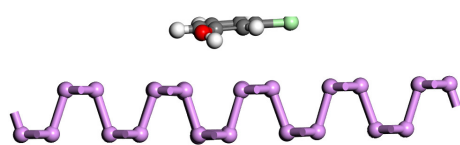

$$d = 4.393$$

3-chlorophenol

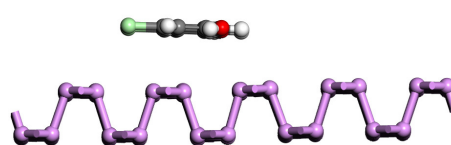

$$d = 4.465$$

3-chlorophenol

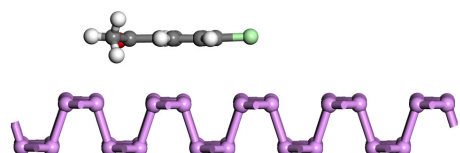

$$d = 4.524$$

4-chloroacetophenone

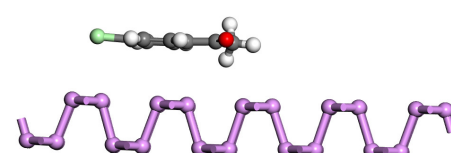

$$d = 4.526$$

4-chloroacetophenone

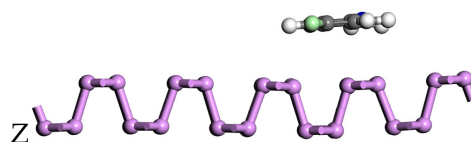

$$d = 4.447$$

4-chlorophenylamine

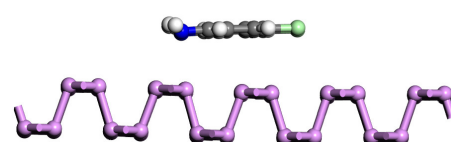

$$d = 4.513$$

4-chlorophenylamine

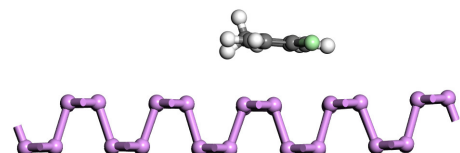

$$d = 4.551$$

4-chlorotoluene

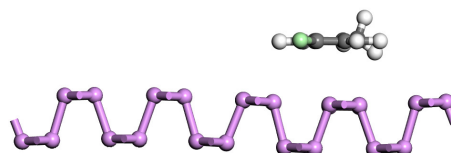

$$d = 4.613$$

4-chlorotoluene

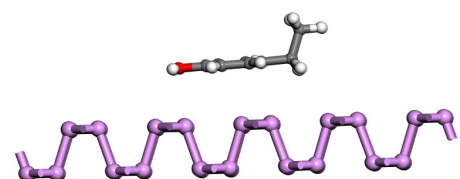

$$d = 4.773$$

4-ethylphenol

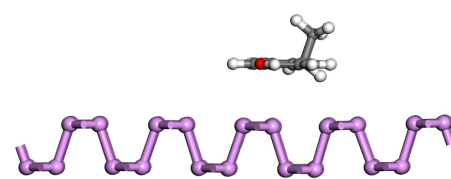

$$d = 4.762$$

4-ethylphenol



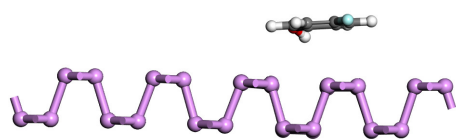

$$d = 4.427$$

4-fluorophenol

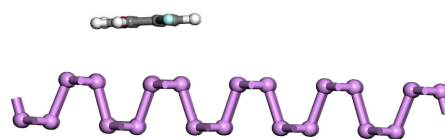

$$d = 4.479$$

4-fluorophenol

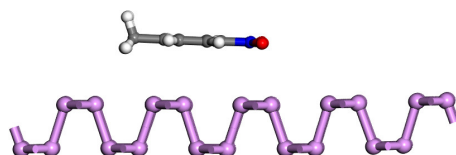

$$d = 4.490$$

4-nitrotoluene

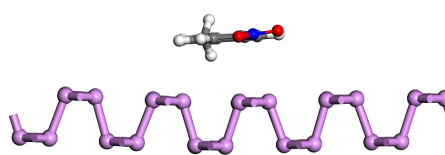

$$d = 4.476$$

4-nitrotoluene

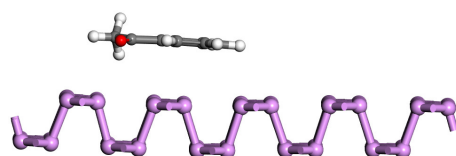

$$d = 4.485$$

acetophenone

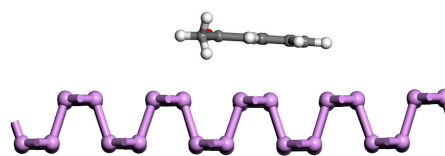

$$d = 4.493$$

acetophenone

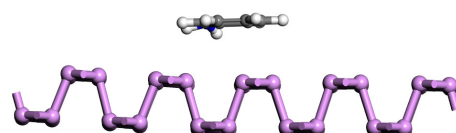

$$d = 4.393$$

aniline

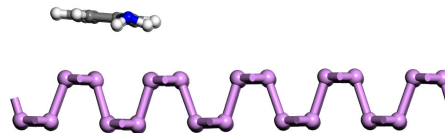

$$d = 4.396$$

aniline

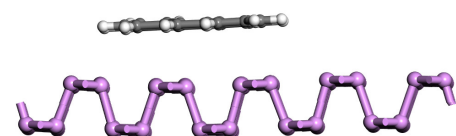

$$d = 4.453$$

anthracene

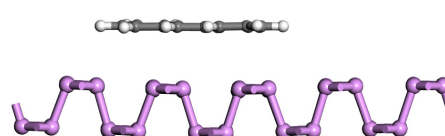

$$d = 4.466$$

anthracene

---

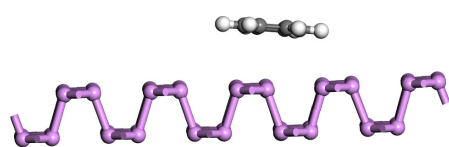

$$d = 4.440$$

benzene

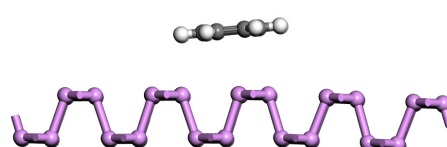

$$d = 4.438$$

benzene

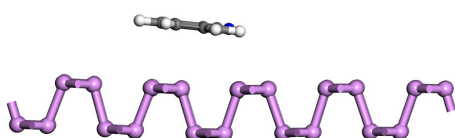

$$d = 4.470$$

benzonitrile

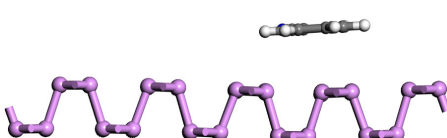

$$d = 4.493$$

benzonitrile

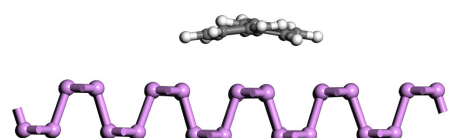

$$d = 4.596$$

biphenyl

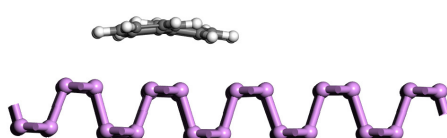

$$d = 4.547$$

biphenyl

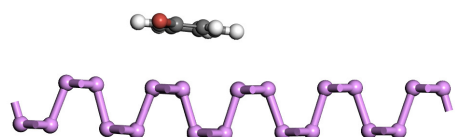

$$d = 4.523$$

bromobenzene

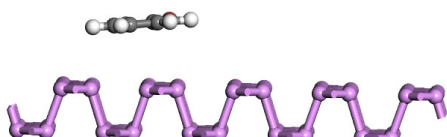

$$d = 4.437$$

bromobenzene

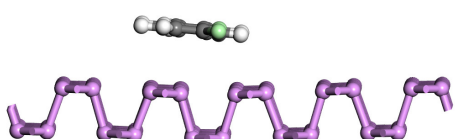

$$d = 4.490$$

chlorobenzene

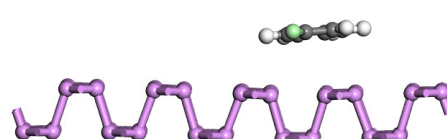

$$d = 4.449$$

chlorobenzene

---



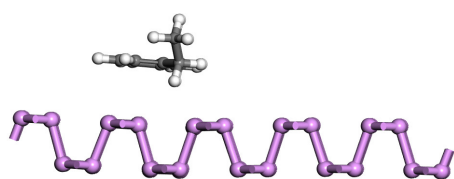

$d = 4.729$   
ethylbenzene

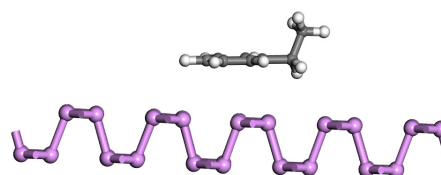

$d = 4.692$   
ethylbenzene

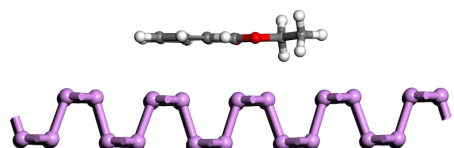

$d = 4.516$   
ethylbenzoate

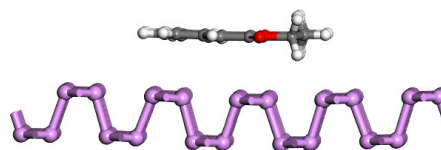

$d = 4.554$   
ethylbenzoate

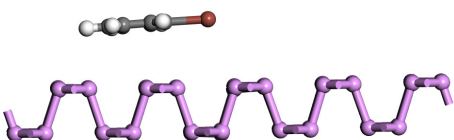

$d = 4.484$   
iodobenzene

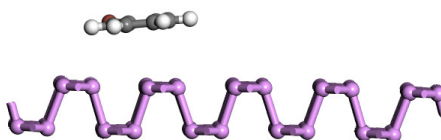

$d = 4.501$   
iodobenzene

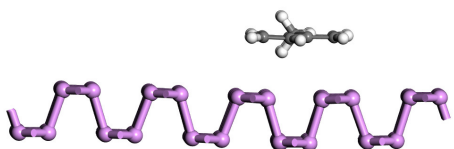

$d = 4.509$   
isoprene

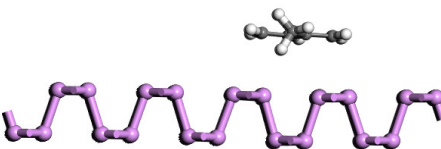

$d = 4.422$   
isoprene

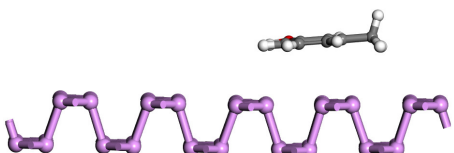

$d = 4.432$   
m-cresol

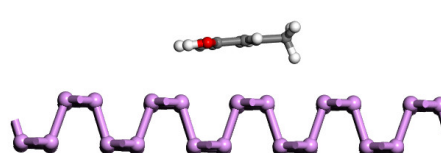

$d = 4.478$   
m-cresol

---

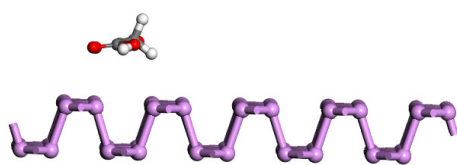

$d = 4.426$   
malonic acid

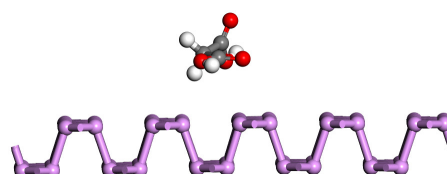

$d = 4.528$   
malonic acid

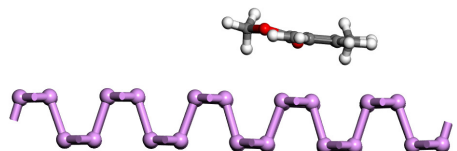

$d = 4.505$   
methyl-2-methylbenzoate

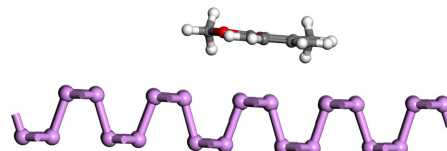

$d = 4.503$   
methyl-2-methylbenzoate

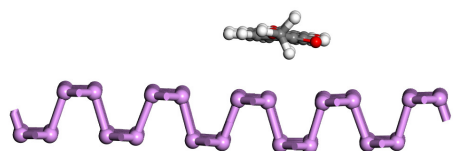

$d = 4.467$   
methylbenzoate

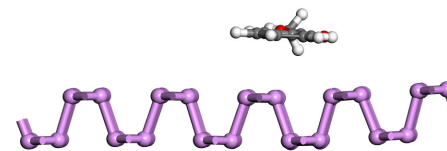

$d = 4.489$   
methylbenzoate

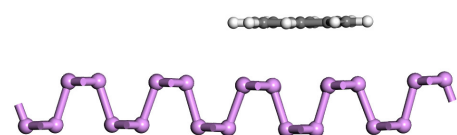

$d = 4.537$   
naphthalene

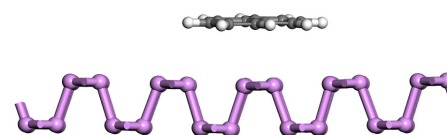

$d = 4.350$   
naphthalene

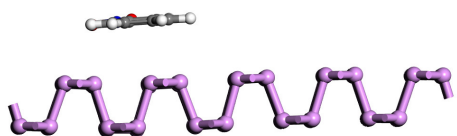

$d = 4.394$   
nitrobenzene

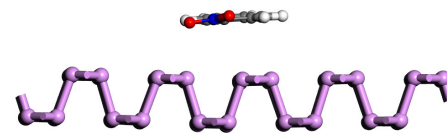

$d = 4.434$   
nitrobenzene

---

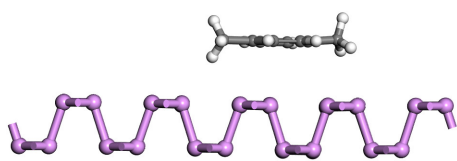

$$d = 4.619$$

p-xylene

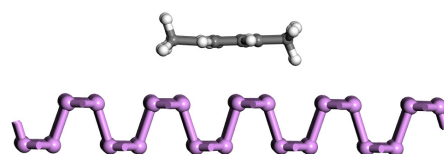

$$d = 4.589$$

p-xylene

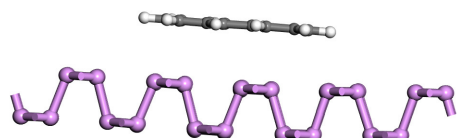

$$d = 4.516$$

phenanthrene

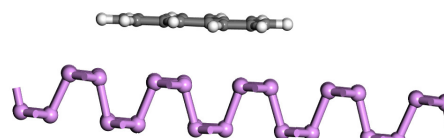

$$d = 4.473$$

phenanthrene

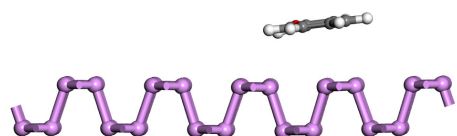

$$d = 4.434$$

phenol

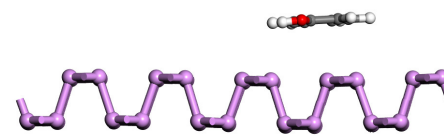

$$d = 4.381$$

phenol

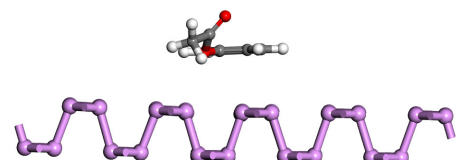

$$d = 4.610$$

phenyl acetate

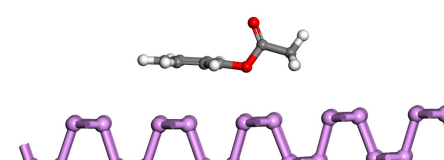

$$d = 4.562$$

phenyl acetate

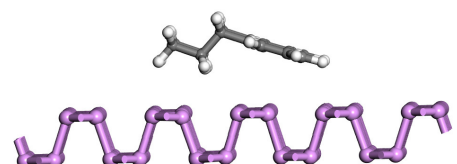

$$d = 4.638$$

propylbenzene

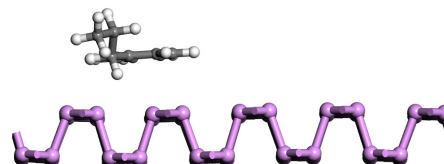

$$d = 4.899$$

propylbenzene

---

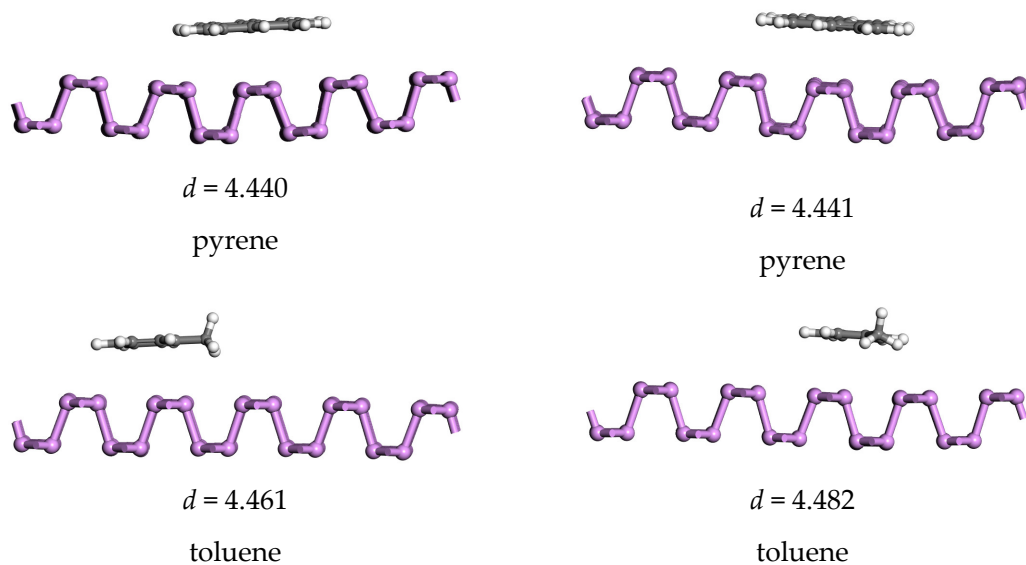

$d$  represents the vertical distance between the geometric center of the adsorbates and that of BP.

**Table S15. Root mean square deviation (RMSD) between the initial and the optimized adsorption configurations of BP.**

| CAS no.  | Name         | <sup>a</sup> RMSD (nm) |               |
|----------|--------------|------------------------|---------------|
|          |              | Gaseous phase          | Aqueous phase |
| 141-82-2 | malonic acid | 0.02                   | 0.03          |
| 78-79-5  | isoprene     | 0.09                   | 0.04          |
| 71-43-2  | benzene      | 0.04                   | 0.09          |
| 62-53-3  | aniline      | 0.10                   | 0.06          |
| 108-88-3 | toluene      | 0.05                   | 0.08          |
| 108-95-2 | phenol       | 0.05                   | 0.07          |
| 98-95-3  | nitrobenzene | 0.08                   | 0.08          |
| 100-47-0 | benzonitrile | 0.10                   | 0.09          |

|          |                           |      |      |
|----------|---------------------------|------|------|
| 100-41-4 | ethylbenzene              | 0.08 | 0.03 |
| 98-86-2  | acetophenone              | 0.09 | 0.06 |
| 122-79-2 | phenyl acetate            | 0.06 | 0.09 |
| 93-58-3  | methylbenzoate            | 0.10 | 0.10 |
| 103-65-1 | propylbenzene             | 0.02 | 0.07 |
| 93-89-0  | ethylbenzoate             | 0.10 | 0.11 |
| 528-29-0 | 1,2-dinitrobenzene        | 0.07 | 0.04 |
| 99-65-0  | 1,3-dinitrobenzene        | 0.15 | 0.14 |
| 100-25-4 | 1,4-dinitrobenzene        | 0.13 | 0.03 |
| 99-99-0  | 4-nitrotoluene            | 0.05 | 0.12 |
| 106-42-3 | p-xylene                  | 0.03 | 0.03 |
| 108-39-4 | m-cresol                  | 0.05 | 0.03 |
| 371-41-5 | 4-fluorophenol            | 0.06 | 0.05 |
| 123-07-9 | 4-ethylphenol             | 0.02 | 0.05 |
| 587-03-1 | (3-methylphenyl) methanol | 0.03 | 0.09 |
| 89-71-4  | methyl-2-methylbenzoate   | 0.07 | 0.07 |
| 108-68-9 | 3,5-dimethylphenol        | 0.05 | 0.09 |
| 591-20-8 | 3-bromophenol             | 0.10 | 0.03 |
| 108-43-0 | 3-chlorophenol            | 0.05 | 0.05 |
| 99-91-2  | 4-chloroacetophenone      | 0.03 | 0.06 |
| 106-43-4 | 4-chlorotoluene           | 0.10 | 0.11 |
| 108-86-1 | bromobenzene              | 0.11 | 0.02 |
| 108-90-7 | chlorobenzene             | 0.11 | 0.08 |
| 591-50-4 | iodobenzene               | 0.04 | 0.07 |
| 106-47-8 | 4-chlorophenylamine       | 0.10 | 0.05 |
| 121-14-2 | 2,4-dinitrotoluene        | 0.18 | 0.07 |

|          |                     |      |      |
|----------|---------------------|------|------|
| 91-20-3  | naphthalene         | 0.11 | 0.09 |
| 92-52-4  | biphenyl            | 0.08 | 0.09 |
| 90-12-0  | 1-methylnaphthalene | 0.09 | 0.06 |
| 75-07-0  | acetaldehyde        | 0.02 | 0.01 |
| 85-01-8  | phenanthrene        | 0.10 | 0.08 |
| 120-12-7 | anthracene          | 0.10 | 0.11 |
| 129-00-0 | pyrene              | 0.21 | 0.14 |

$^a \text{RMSD} = \sqrt{\frac{\sum_{i=1}^N (X_i - Y_i)^2}{N}}$ , where  $N$  is the number of atoms in BP,  $X_i$  is the initial coordinate vector of atom  $i$ , and  $Y_i$  the coordinate vector of atom  $i$  after aligning adsorbates with the initial coordinate vector.

**Table S16. Relative contributions of different interactions to the overall adsorption of BP in the gaseous phase.**

| Term            | $ E_{\text{ad}} $ | $\log K$ | $^a \log K$ |                   |
|-----------------|-------------------|----------|-------------|-------------------|
|                 |                   |          | $T\Delta S$ | $ E_{\text{ad}} $ |
| $eE$            | 7%                | 0%       | -15%        | 14%               |
| $sS$            | -40%              | -17%     | 61%         | -78%              |
| $aA$            | 1%                | -3%      | -5%         | 2%                |
| $bB$            | 11%               | 6%       | -15%        | 21%               |
| $lL$            | 87%               | 110%     | -58%        | 170%              |
| $^b \text{Sum}$ | 66%               | 96%      | -32%        | 129%              |

$^a \Delta G_{\text{MD(gaseous)}}$  was decomposed into  $T\Delta S$  and  $E_{\text{ad}}$  using the results of MD and DFT, and  $T\Delta S$  and  $E_{\text{ad}}$  were further decomposed into various intermolecular interactions by pp-LFERs.  $^b$  The sum consists of the five terms with explicit

interactions, and does not include the contributions of the intercept term in the pp-LFERs. The contribution is average fractions of the terms in the sum of the six terms in the pp-LFERs.

**Table S17. Adsorption free energy ( $\Delta G_{MD}$ ) and  $\log K$  values for 30 aromatic compounds onto BP and graphene in the aqueous and gaseous phases.**

| Name                    | Aqueous         |          |                 |          | Gaseous         |          |                 |          |
|-------------------------|-----------------|----------|-----------------|----------|-----------------|----------|-----------------|----------|
|                         | BP              |          | Graphene        |          | BP              |          | Graphene        |          |
|                         | $\Delta G_{MD}$ | $\log K$ |
| pyrene                  | -12.7           | 8.1      | -12.1           | 7.7      | -18.8           | 12.5     | -18.2           | 12.4     |
| phenanthrene            | -10.8           | 6.7      | -10.0           | 6.2      | -16.6           | 11.0     | -16.4           | 10.9     |
| anthracene              | -10.4           | 6.5      | -10.1           | 6.2      | -16.3           | 10.8     | -16.2           | 10.9     |
| biphenyl                | -7.6            | 4.5      | -7.4            | 4.5      | -12.5           | 8.1      | -12.3           | 8.2      |
| 1-methylnaphthalene     | -8.2            | 4.9      | -7.3            | 4.2      | -13.2           | 8.6      | -12.6           | 8.5      |
| methyl-2-methylbenzoate | -7.0            | 4.1      | -6.4            | 3.7      | -11.6           | 7.4      | -11.0           | 7.2      |
| ethylbenzoate           | -7.8            | 4.6      | -7.7            | 4.6      | -11.9           | 7.6      | -11.6           | 7.7      |
| naphthalene             | -6.8            | 3.9      | -6.8            | 3.9      | -11.1           | 7.1      | -11.2           | 7.3      |
| 3,5-dimethylphenol      | -7.0            | 4.0      | -6.8            | 3.9      | -10.9           | 6.9      | -10.1           | 6.6      |

|                           |      |     |      |     |       |     |       |     |
|---------------------------|------|-----|------|-----|-------|-----|-------|-----|
| (3-methylphenyl) methanol | -6.0 | 3.4 | -6.2 | 3.5 | -10.0 | 6.4 | -9.6  | 6.2 |
| methylbenzoate            | -7.8 | 4.7 | -6.9 | 4.0 | -11.2 | 7.1 | -10.6 | 6.9 |
| 2,4-dinitrotoluene        | -8.3 | 5.0 | -7.7 | 4.6 | -13.8 | 9.0 | -13.2 | 8.8 |
| propylbenzene             | -5.8 | 3.4 | -5.3 | 3.1 | -9.9  | 6.3 | -9.4  | 6.1 |
| 1,4-dinitrobenzene        | -8.4 | 5.1 | -7.9 | 4.7 | -13.1 | 8.5 | -13.0 | 8.6 |
| p-xylene                  | -6.0 | 3.3 | -5.5 | 3.0 | -9.6  | 6.1 | -9.2  | 5.9 |
| acetophenone              | -6.1 | 3.4 | -6.2 | 3.5 | -10.1 | 6.4 | -9.5  | 6.2 |
| phenyl acetate            | -5.5 | 3.0 | -5.6 | 3.2 | -10.2 | 6.5 | -9.7  | 6.3 |
| 1,3-dinitrobenzene        | -8.5 | 5.1 | -7.8 | 4.6 | -13.1 | 8.5 | -13.1 | 8.7 |
| 4-ethylphenol             | -6.0 | 3.4 | -5.9 | 3.4 | -9.9  | 6.2 | -9.2  | 6.0 |
| 4-nitrotoluene            | -7.8 | 4.6 | -7.5 | 4.4 | -11.9 | 7.6 | -11.1 | 7.3 |
| m-cresol                  | -6.0 | 3.3 | -5.8 | 3.2 | -9.6  | 6.0 | -9.1  | 5.9 |
| ethylbenzene              | -4.9 | 2.7 | -5.1 | 2.8 | -9.0  | 5.6 | -8.2  | 5.3 |
| aniline                   | -4.1 | 2.1 | -3.4 | 1.6 | -8.1  | 4.9 | -7.9  | 5.0 |



|                    |      |     |      |     |       |     |       |     |
|--------------------|------|-----|------|-----|-------|-----|-------|-----|
| toluene            | -4.8 | 2.6 | -5.1 | 2.8 | -8.1  | 5.0 | -8.0  | 5.0 |
| nitrobenzene       | -6.3 | 3.6 | -6.3 | 3.6 | -10.2 | 6.5 | -9.4  | 6.1 |
| 1,2-dinitrobenzene | -6.8 | 4.0 | -6.2 | 3.5 | -11.6 | 7.5 | -10.7 | 7.1 |
| benzonitrile       | -6.3 | 3.6 | -5.7 | 3.2 | -9.7  | 6.1 | -8.9  | 5.7 |
| 4-fluorophenol     | -5.9 | 3.3 | -5.4 | 3.0 | -8.8  | 5.4 | -8.1  | 5.1 |
| phenol             | -5.0 | 2.7 | -4.9 | 2.6 | -8.4  | 5.1 | -7.9  | 5.0 |
| benzene            | -3.8 | 1.9 | -3.5 | 1.8 | -7.1  | 4.3 | -6.5  | 4.0 |

---

$\Delta G_{MD}$ : kcal/mol;  $K$ : mL/g.

## REFERENCES

1. Vanommeslaeghe, K.; Hatcher, E.; Acharya, C.; Kundu, S.; Zhong, S.; Shim, J.; Darian, E.; Guvench, O.; Lopes, P.; Vorobyov, I.; MacKerell, A.D. Charmm general force field: A force field for drug-like molecules compatible with the charmm all-atom additive biological force fields. *J. Comput. Chem.* **2010**, 31(4), 671-690.
2. Azhagiya Singam, E.R.; Zhang, Y.; Magnin, G.; Miranda-Carvajal, I.; Coates, L.; Thakkar, R.; Poblete, H.; Comer, J. Thermodynamics of adsorption on graphenic surfaces from aqueous solution. *J. Chem. Theory Comput.* **2019**, 15(2), 1302-1316.
3. Otyepkova, E.; Lazar, P.; Cepe, K.; Tomanec, O.; Otyepka, M. Organic adsorbates have higher affinities to fluorographene than to graphene. *Appl. Mater. Today* **2016**, 5, 142-149.

4. Lazar, P.; Karlicky, F.; Jurecka, P.; Kocman, M.; Otyepkova, E.; Safarova, K.; Otyepka, M. Adsorption of small organic molecules on graphene. *J. Am. Chem. Soc.* **2013**, 135(16), 6372-6377.
5. Ersan, G.; Apul, O.G.; Karanfil, T. Predictive models for adsorption of organic compounds by graphene nanosheets: Comparison with carbon nanotubes. *Sci. Total Environ.* **2019**, 654, 28-34.
6. Mayne, C.G.; Saam, J.; Schulten, K.; Tajkhorshid, E.; Gumbart, J.C. Rapid parameterization of small molecules using the force field toolkit. *J. Comput. Chem.* **2013**, 34(32), 2757-2770.
